# Supplementary material
Source: publisher figshare collection journal article supplement (https://gsajournals.figshare.com/ndownloader/files/22441541)
Supplement: Supplementary file 1 [file 22441541]

## Sheet: Kankel et al Table S1
Column A	Column B	Column C	Column D	Column E	Column F	Column G	Column H	Column I	Column J	Column K	Column L
Overlapping ValidatedGMR-hFUS and GMR-hTDP-43 Modifying Strains	GMR-hFUS Validated	GMR-hTDP-43 Validated	GMR-hFUS Validation Modification	GMR-hTDP-43 Validation Modification	Same Modification	Drosophila Gene Symbol	FBgn	Drosophila GeneID	DIOPT Best Human Ortholog	Human GeneID	DIOPT Ortholog Score
d00645	d00645	d00645	?2	E2	NO	Pvf2	FBgn0031888	33994	VEGFC	7424	1
f04615	f04615	f04615	?2	E2	NO	dco	FBgn0002413	43673	CSNK1D	1453	12
d01760	d01760	d01760	?2	E3	NO	bol	FBgn0011206	39049	BOLL	66037	11
c06593	c06593	c06593	?2	S2	NO	CG30002	FBgn0260474	246384	PLAU	5328	1
d04280	d04280	d04280	?2	S2	NO	fs(1)h	FBgn0004656	31722	BRD4	23476	9
d10839	d10839	d10839	?3	E3	NO	CG2931	FBgn0037342	40673	RBM42	79171	11
d04396	d04396	d04396	E1	S1	NO	PGRP-LF	FBgn0035977	39064	PGLYRP3	114771	8
d05241	d05241	d05241	E1	S1	NO	ec	FBgn0000542	31339	USP54	159195	9
d06579	d06579	d06579	E1	S1	NO	0	0	0	#N/A	#N/A	#N/A
d07355	d07355	d07355	E1	S1	NO	CG13654	FBgn0039290	43028	TMEM8B	51754	11
d09251	d09251	d09251	E1	S1	NO	0	FBgn0260966	0	#N/A	#N/A	#N/A
d09813	d09813	d09813	E1	S1	NO	Alh	FBgn0261238	40850	MLLT6	4302	9
d00015	d00015	d00015	E1	S2	NO	MED22	FBgn0040339	31038	MED22	6837	14
d01050	d01050	d01050	E1	S2	NO	Ptp61F	FBgn0003138	38160	PTPN1	5770	11
d01650	d01650	d01650	E1	S2	NO	CG34380	FBgn0085409	5740323	DDR2	4921	11
d02292	d02292	d02292	E1	S2	NO	0	0	0	#N/A	#N/A	#N/A
d03425	d03425	d03425	E1	S2	NO	0	0	0	#N/A	#N/A	#N/A
d06513	d06513	d06513	E1	S2	NO	scny	FBgn0260936	38648	USP36	57602	11
d09392	d09392	d09392	E1	S2	NO	CG31760	FBgn0051760	34642	GPR179	440435	7
d09824	d09824	d09824	E1	S2	NO	0	FBgn0029538	0	#N/A	#N/A	#N/A
d11088	d11088	d11088	E1	S2	NO	Gsc	FBgn0010323	33240	GSC	145258	6
d03150	d03150	d03150	E1	S2	NO	hppy	FBgn0263255	0	MAP4K3	8491	14
d06594	d06594	d06594	E1	S3	NO	dlt	FBgn0024510	46719	CDAN1	146059	12
d08353	d08353	d08353	E2	?1	NO	rdx	FBgn0262907	41704	SPOP	8405	10
d00987	d00987	d00987	E2	?2	NO	cas	FBgn0004878	44018	CASZ1	54897	8
d08346	d08346	d08346	E2	?2	NO	0	0	0	#N/A	#N/A	#N/A
d08814	d08814	d08814	E2	?2	NO	0	0	0	#N/A	#N/A	#N/A
d09417	d09417	d09417	E2	?2	NO	CG17739	FBgn0033710	36333	SPON1	10418	13
d01988	d01988	d01988	E2	E/S1	NO	ImpL2	FBgn0001257	38513	BSG	682	1
c00560	c00560	c00560	E2	S1	NO	Xrp1	FBgn0261113	42267	0	0	0
c06582	c06582	c06582	E2	S1	NO	cdc23	FBgn0032863	35315	CDC23	8697	14
d00218	d00218	d00218	E2	S1	NO	tok	FBgn0004885	42944	TLL1	7092	10
d00284	d00284	d00284	E2	S1	NO	GstD1	FBgn0001149	41503	GSTT2B	653689	2
d05073	d05073	d05073	E2	S1	NO	w	FBgn0003996	31271	ABCG2	9429	6
d06222	d06222	d06222	E2	S1	NO	Pvf1	FBgn0030964	32876	PDGFA	5154	5
d07714	d07714	d07714	E2	S1	NO	tou	FBgn0033636	36241	BAZ2B	29994	10
e00906	e00906	e00906	E2	S1	NO	CG3803	FBgn0034938	37809	COX15	1355	14
f05086	f05086	f05086	E2	S1	NO	WASp	FBgn0024273	43402	WAS	7454	13
f05913	f05913	f05913	E2	S1	NO	0	0	0	#N/A	#N/A	#N/A
d03337	d03337	d03337	E2	S2	NO	jigr1	FBgn0039350	43093	MSANTD2	79684	1
d04947	d04947	d04947	E2	S2	NO	zfh2	FBgn0004607	43795	ZFHX3	463	12
d05016	d05016	d05016	E2	S2	NO	Fim	FBgn0024238	32721	LCP1	3936	14
d08015	d08015	d08015	E2	S2	NO	CG42663	FBgn0261545	36403	NCKAP5	344148	3
d09108	d09108	d09108	E2	S2	NO	dikar	FBgn0261934	38747	CECR2	27443	8
d10152	d10152	d10152	E2	S2	NO	A2bp1	FBgn0052062	39198	RBFOX2	23543	9
d04901	d04901	d04901	E2	S2	NO	jigr1	FBgn0039350	43093	MSANTD2	79684	1
d03818	d03818	d03818	E2	S3	NO	CG11700	FBgn0029856	31564	UBB	7314	5
d07499	d07499	d07499	E2	S3	NO	CG1532	FBgn0031143	33076	GLOD4	51031	9
d04583	d04583	d04583	E3	S1	NO	0	0	0	#N/A	#N/A	#N/A
d09713	d09713	d09713	E3	S1	NO	out	FBgn0259834	32926	SLC16A11	162515	4
d06989	d06989	d06989	E3	S2	NO	orb	FBgn0004882	42752	CPEB1	64506	6
d10130	d10130	d10130	E3	S3	NO	0	0	0	#N/A	#N/A	#N/A
c06318	c06318	c06318	S1	E1	NO	CG40470	FBgn0058470	3355093	LVRN	206338	3
d03175	d03175	d03175	S1	E1	NO	trbl	FBgn0028978	43999	TRIB2	28951	11
d05394	d05394	d05394	S1	E1	NO	Pvf2	FBgn0031888	33994	VEGFC	7424	1
f05134	f05134	f05134	S1	E1	NO	chic	FBgn0000308	33834	PFN4	375189	8
d00550	d00550	d00550	S1	E2	NO	lbm	FBgn0016032	35623	UPK1B	7348	1
e02749	e02749	e02749	S1	E2	NO	th	FBgn0260635	39753	DBH	1621	15
f00690	f00690	f00690	S1	E2	NO	wnd	FBgn0036896	40143	MAP3K13	9175	11
d00904	d00904	d00904	S1	E2	NO	eff	FBgn0011217	41785	UBE2D3	7323	13
d02211	d02211	d02211	S1	E3	NO	CG9095	FBgn0030617	32447	SELP	6403	2
d04218	d04218	d04218	S2	?2	NO	Hsromega	FBgn0001234	3772547	0	0	0
d02467	d02467	d02467	S2	E1	NO	CG10082	FBgn0034644	37465	IP6K1	9807	11
f01800	f01800	f01800	S2	E1	NO	CG12428	FBgn0039543	43332	CROT	54677	13
f02216	f02216	f02216	S2	E1	NO	CG10253	FBgn0033983	36669	AGPS	8540	14
c03331	c03331	c03331	S2	E2	NO	Mef2	FBgn0011656	36032	MEF2A	4205	12
d01735	d01735	d01735	S2	E2	NO	D	FBgn0000411	39570	SOX21	11166	7
d06230	d06230	d06230	S2	E2	NO	CG31626	FBgn0051626	318859	POU2AF1	5450	1
d09381	d09381	d09381	S2	E2	NO	CG17834	FBgn0028394	34191	0	0	0
e02934	e02934	e02934	S2	E2	NO	CG42238	FBgn0250867	7354398	0	0	0
d09379	d09379	d09379	S2	E3	NO	kibra	FBgn0262127	41783	WWC1	23286	13
f02674	f02674	f02674	S2	E2	NO	glo	FBgn0259139	0	HNRNPH1	3187	10
d04507	d04507	d04507	S3	E1	NO	CG14438	FBgn0029899	31615	ZNF462	58499	1
d00711	d00711	d00711	S3	E2	NO	dco	FBgn0002413	43673	CSNK1D	1453	12
d06510	d06510	d06510	S3	E2	NO	dco	FBgn0002413	43673	CSNK1D	1453	12
d07578	d07578	d07578	S3	E2	NO	su(w[a])	FBgn0003638	31054	SFSWAP	6433	13
d04951	d04951	d04951	?3	?3	YES	upd3	FBgn0053542	3346149	0	0	0
d05652	d05652	d05652	?2	?2	YES	CR43334	FBgn0263039	12798545	0	0	0
d06066	d06066	d06066	?2	?2	YES	0	0	0	#N/A	#N/A	#N/A
d09400	d09400	d09400	?2	?2	YES	sca	FBgn0003326	36411	ANGPT4	51378	3
f01116	f01116	f01116	?2	?2	YES	CG43342	FBgn0263047	12798510	0	0	0
f01620	f01620	f01620	?2	?2	YES	CR43334	FBgn0263039	12798545	0	0	0
c05214	c05214	c05214	E2	E1	YES	CG30460	FBgn0050460	36924	ZC2HC1A	51101	4
c06428	c06428	c06428	E3	E3	YES	CG14767	FBgn0040777	50250	LAPTM4A	9741	14
d00002	d00002	d00002	E2	E3	YES	CG32532	FBgn0052532	32943	PROP1	5626	2
d00003	d00003	d00003	E2	E2	YES	Trl	FBgn0013263	2768981	NACC1	112939	1
d00042	d00042	d00042	E2	E2	YES	form3	FBgn0053556	3346238	INF2	64423	8
d00059	d00059	d00059	E3	E3	YES	klu	FBgn0013469	39228	ZNF425	155054	1
d00083	d00083	d00083	E2	E2	YES	HGTX	FBgn0040318	53446	NKX6-2	84504	7
d00135	d00135	d00135	E2	E2	YES	Mkp3	FBgn0036844	40081	DUSP7	1849	12
d00159	d00159	d00159	E2	E3	YES	tws	FBgn0004889	47877	PPP2R2D	55844	15
d00183	d00183	d00183	E2	E3	YES	Trl	FBgn0013263	2768981	NACC1	112939	1
d00216	d00216	d00216	E2	E2	YES	0	0	0	#N/A	#N/A	#N/A
d00231	d00231	d00231	E2	E1	YES	gem	FBgn0050011	36064	TFCP2	7024	12
d00243	d00243	d00243	E2	E2	YES	stv	FBgn0086708	39518	BAG3	9531	8
d00278	d00278	d00278	E2	E2	YES	dpn	FBgn0010109	35800	HES1	3280	8
d00283	d00283	d00283	E2	E3	YES	Hnf4	FBgn0004914	44544	HNF4G	3174	13
d00301	d00301	d00301	E2	E3	YES	0	0	0	#N/A	#N/A	#N/A
d00354	d00354	d00354	E2	E3	YES	CG42265	FBgn0259150	7354434	OTOP2	92736	9
d00366	d00366	d00366	E2	E3	YES	CG10777	FBgn0029979	31707	DDX5	1655	7
d00377	d00377	d00377	E2	E2	YES	0	0	0	#N/A	#N/A	#N/A
d00425	d00425	d00425	E2	E2	YES	CG8557	FBgn0030842	32729	ARHGEF10L	55160	9
d00428	d00428	d00428	E2	E2	YES	sgg	FBgn0003371	31248	GSK3B	2932	10
d00460	d00460	d00460	E3	E2	YES	CG8785	FBgn0033760	36391	SLC36A4	120103	8
d00472	d00472	d00472	E2	E1	YES	CG1516	FBgn0027580	36020	PC	5091	13
d00598	d00598	d00598	E2	E2	YES	Pdcd4	FBgn0030520	32337	PDCD4	27250	13
d00627	d00627	d00627	E3	E3	YES	0	0	0	#N/A	#N/A	#N/A
d00685	d00685	d00685	E2	E3	YES	Tis11	FBgn0011837	32222	ZFP36L1	677	9
d00698	d00698	d00698	E2	E2	YES	CG17323	FBgn0032713	35138	UGT2B10	7365	5
d00706	d00706	d00706	E2	E2	YES	Trx-2	FBgn0040070	34281	TXN	7295	13
d00740	d00740	d00740	E3	E3	YES	ldbr	FBgn0035838	38900	DBR1	51163	14
d00824	d00824	d00824	E1	E2	YES	NT5E-2	FBgn0050104	246458	NT5E	4907	13
d00856	d00856	d00856	E1	E2	YES	Best2	FBgn0035696	38727	BEST4	266675	7
d00860	d00860	d00860	E3	E3	YES	CG32767	FBgn0052767	31430	ZNF485	220992	1
d00884	d00884	d00884	E2	E3	YES	0	0	0	#N/A	#N/A	#N/A
d00894	d00894	d00894	E3	E3	YES	RhoGAP19D	FBgn0031118	33048	ARHGAP23	57636	10
d00916	d00916	d00916	E1	E1	YES	0	0	0	#N/A	#N/A	#N/A
d00919	d00919	d00919	E2	E2	YES	0	0	0	#N/A	#N/A	#N/A
d00926	d00926	d00926	E2	E3	YES	trx	FBgn0003862	41737	KMT2B	9757	9
d00983	d00983	d00983	E3	E3	YES	0	0	0	#N/A	#N/A	#N/A
d00995	d00995	d00995	E3	E2	YES	0	0	0	#N/A	#N/A	#N/A
d01022	d01022	d01022	E3	E3	YES	CG8630	FBgn0038130	41629	SCD	6319	12
d01027	d01027	d01027	E2	E2	YES	h	FBgn0001168	38995	HES4	57801	10
d01041	d01041	d01041	E2	E2	YES	bs	FBgn0004101	37890	SRF	6722	13
d01076	d01076	d01076	E2	E2	YES	E(spl)m3-HLH	FBgn0002609	43156	HES2	54626	5
d01205	d01205	d01205	E2	E2	YES	crol	FBgn0020309	34592	ZNF569	148266	3
d01221	d01221	d01221	E2	E3	YES	Su(z)2	FBgn0008654	36432	PCGF2	7703	6
d01225	d01225	d01225	E1	E2	YES	ed	FBgn0000547	33619	OBSCN	84033	1
d01238	d01238	d01238	E3	E3	YES	0	FBgn0026087	0	#N/A	#N/A	#N/A
d01278	d01278	d01278	E2	E2	YES	trbl	FBgn0028978	43999	TRIB2	28951	11
d01337	d01337	d01337	E2	E2	YES	CG30089	FBgn0050089	36736	0	0	0
d01418	d01418	d01418	E2	E2	YES	CG2889	FBgn0030206	31977	ZNF677	342926	1
d01447	d01447	d01447	E1	E2	YES	mub	FBgn0262737	40436	PCBP3	54039	14
d01489	d01489	d01489	E3	E3	YES	cg	FBgn0000289	36571	ZNF280C	55609	1
d01556	d01556	d01556	E2	E1	YES	lig	FBgn0020279	35771	UBAP2	55833	10
d01620	d01620	d01620	E2	E2	YES	mwh	FBgn0260963	38131	FMNL1	752	2
d01682	d01682	d01682	E3	E3	YES	0	0	0	#N/A	#N/A	#N/A
d01696	d01696	d01696	E2	E2	YES	SPoCk	FBgn0052451	40495	ATP2C1	27032	15
d01703	d01703	d01703	E2	E2	YES	Mkp3	FBgn0036844	40081	DUSP7	1849	12
d01740	d01740	d01740	E3	E2	YES	CG4991	FBgn0030817	32695	SLC36A2	153201	8
d01788	d01788	d01788	E1	E1	YES	0	0	0	#N/A	#N/A	#N/A
d01830	d01830	d01830	E2	E3	YES	Ras85D	FBgn0003205	41140	HRAS	3265	12
d01845	d01845	d01845	E2	E3	YES	sqz	FBgn0010768	42300	ZNF362	149076	3
d01873	d01873	d01873	E3	E3	YES	vri	FBgn0016076	33759	NFIL3	4783	5
d01912	d01912	d01912	E3	E3	YES	CG9932	FBgn0262160	34701	ZNF462	58499	2
d02039	d02039	d02039	E3	E2	YES	Fem-1	FBgn0034542	37344	FEM1B	10116	14
d02069	d02069	d02069	E3	E3	YES	E(spl)m3-HLH	FBgn0002609	43156	HES2	54626	5
d02230	d02230	d02230	E3	E3	YES	CG9650	FBgn0029939	31660	BCL11B	64919	10
d02300	d02300	d02300	E2	E2	YES	CG32532	FBgn0052532	32943	PROP1	5626	2
d02306	d02306	d02306	E3	E3	YES	Gmap	FBgn0027287	32483	TRIP11	9321	8
d02319	d02319	d02319	E2	E3	YES	sr	FBgn0003499	42162	EGR2	1959	6
d02321	d02321	d02321	E2	E2	YES	Pur-alpha	FBgn0022361	43797	PURA	5813	13
d02329	d02329	d02329	E2	E2	YES	Gpo-1	FBgn0022160	47611	GPD2	2820	13
d02376	d02376	d02376	E3	E3	YES	0	0	0	#N/A	#N/A	#N/A
d02401	d02401	d02401	E2	E3	YES	sr	FBgn0003499	42162	EGR2	1959	6
d02444	d02444	d02444	E2	E2	YES	Pvf2	FBgn0031888	33994	VEGFC	7424	1
d02451	d02451	d02451	E2	E3	YES	Rbp9	FBgn0010263	33498	ELAVL4	1996	11
d02502	d02502	d02502	E2	E3	YES	CASK	FBgn0013759	42567	CASK	8573	13
d02520	d02520	d02520	E3	E3	YES	dac	FBgn0005677	34982	DACH1	1602	10
d02541	d02541	d02541	E1	E2	YES	mfr	FBgn0035935	39016	FER1L6	654463	14
d02760	d02760	d02760	E2	E2	YES	E2f	FBgn0011766	42550	E2F5	1875	9
d02906	d02906	d02906	E2	E2	YES	E(bx)	FBgn0000541	44811	BPTF	2186	13
d02910	d02910	d02910	E2	E2	YES	sca	FBgn0003326	36411	ANGPT4	51378	3
d02924	d02924	d02924	E3	E3	YES	0	0	0	#N/A	#N/A	#N/A
d02972	d02972	d02972	E2	E2	YES	ovo	FBgn0003028	31429	OVOL1	5017	9
d03029	d03029	d03029	E3	E3	YES	egr	FBgn0033483	36054	EDA	1896	5
d03131	d03131	d03131	E3	E3	YES	0	0	0	#N/A	#N/A	#N/A
d03135	d03135	d03135	E2	E2	YES	Dscam	FBgn0033159	35652	DSCAML1	57453	13
d03144	d03144	d03144	E2	E3	YES	barc	FBgn0037081	40369	HTATSF1	27336	11
d03191	d03191	d03191	E2	E3	YES	Mef2	FBgn0011656	36032	MEF2A	4205	12
d03192	d03192	d03192	E2	E2	YES	spi	FBgn0005672	35253	BTC	685	1
d03228	d03228	d03228	E1	E3	YES	crol	FBgn0020309	34592	ZNF569	148266	3
d03230	d03230	d03230	E2	E2	YES	CG34288	FBgn0085317	5740644	0	0	0
d03287	d03287	d03287	E2	E2	YES	CR31044	FBgn0051044	10178917	0	0	0
d03371	d03371	d03371	E2	E2	YES	Syx4	FBgn0024980	31269	STX11	8676	4
d03424	d03424	d03424	E2	E2	YES	cpo	FBgn0000363	45840	RBPMS	11030	8
d03437	d03437	d03437	E2	E2	YES	eIF-4E	FBgn0015218	45525	EIF4E	1977	15
d03500	d03500	d03500	E2	E2	YES	CG9894	FBgn0031453	33462	0	0	0
d03569	d03569	d03569	E2	E3	YES	Mes-4	FBgn0039559	43351	NSD3	54904	13
d03591	d03591	d03591	E2	E1	YES	D	FBgn0000411	39570	SOX21	11166	7
d03595	d03595	d03595	E3	E3	YES	SF2	FBgn0040284	53443	SRSF1	6426	13
d03620	d03620	d03620	E2	E2	YES	CG11873	FBgn0039633	43435	BICRA	29998	3
d03655	d03655	d03655	E2	E3	YES	stv	FBgn0086708	39518	BAG3	9531	8
d03727	d03727	d03727	E3	E3	YES	CG4612	FBgn0035016	37914	PABPC1L	80336	3
d03766	d03766	d03766	E2	E2	YES	pum	FBgn0003165	41094	PUM2	23369	12
d03771	d03771	d03771	E2	E2	YES	0	0	0	#N/A	#N/A	#N/A
d03821	d03821	d03821	E2	E2	YES	0	0	0	#N/A	#N/A	#N/A
d03841	d03841	d03841	E3	E3	YES	kek1	FBgn0015399	34688	ISLR2	57611	2
d04022	d04022	d04022	E2	E2	YES	wor	FBgn0001983	34906	SNAI2	6591	5
d04087	d04087	d04087	E3	E2	YES	heph	FBgn0011224	48571	PTBP1	5725	12
d04145	d04145	d04145	E2	E2	YES	CG13366	FBgn0025633	31004	SPECC1L	23384	10
d04225	d04225	d04225	E3	E3	YES	pum	FBgn0003165	41094	PUM2	23369	12
d04236	d04236	d04236	E2	E2	YES	sd	FBgn0003345	32536	TEAD3	7005	13
d04242	d04242	d04242	E3	E1	YES	Rox8	FBgn0005649	42848	TIAL1	7073	14
d04252	d04252	d04252	E3	E3	YES	CG17187	FBgn0037882	41351	DNAJC17	55192	14
d04253	d04253	d04253	E3	E2	YES	CG17187	FBgn0037882	41351	DNAJC17	55192	14
d04265	d04265	d04265	E3	E1	YES	CG9203	FBgn0030646	32480	SPRTN	83932	11
d04268	d04268	d04268	E2	E3	YES	0	0	0	#N/A	#N/A	#N/A
d04342	d04342	d04342	E2	E2	YES	0	0	0	#N/A	#N/A	#N/A
d04390	d04390	d04390	E2	E2	YES	sty	FBgn0014388	38424	SPRY2	10253	8
d04448	d04448	d04448	E3	E3	YES	CG11966	FBgn0037645	41069	PRDM15	63977	1
d04557	d04557	d04557	E2	E3	YES	CG10777	FBgn0029979	31707	DDX5	1655	7
d04616	d04616	d04616	E2	E2	YES	ttk	FBgn0003870	48317	ZBTB45	84878	1
d04712	d04712	d04712	E2	E2	YES	0	0	0	#N/A	#N/A	#N/A
d04728	d04728	d04728	E2	E1	YES	BicC	FBgn0000182	34946	BICC1	80114	13
d04734	d04734	d04734	E1	E2	YES	sdk	FBgn0021764	31017	SDK2	54549	11
d04745	d04745	d04745	E2	E2	YES	crp	FBgn0001994	34956	TFAP4	7023	10
d04764	d04764	d04764	E2	E2	YES	gish	FBgn0250823	49701	CSNK1G3	1456	14
d04807	d04807	d04807	E3	E3	YES	lark	FBgn0011640	38811	RBM4B	83759	12
d04844	d04844	d04844	E3	E3	YES	CG42265	FBgn0259150	7354434	OTOP2	92736	9
d04884	d04884	d04884	E2	E2	YES	mRpS26	FBgn0036774	40001	MRPS26	64949	10
d04906	d04906	d04906	E1	E2	YES	Egfr	FBgn0003731	37455	ERBB4	2066	12
d04934	d04934	d04934	E2	E2	YES	CG31522	FBgn0051522	40567	ELOVL7	79993	14
d04962	d04962	d04962	E2	E3	YES	knrl	FBgn0001323	40285	NR1H2	7376	1
d04972	d04972	d04972	E2	E2	YES	CG15093	FBgn0034390	37166	HIBADH	11112	15
d05084	d05084	d05084	E2	E3	YES	stv	FBgn0086708	39518	BAG3	9531	8
d05170	d05170	d05170	E2	E1	YES	spz5	FBgn0035379	38350	0	0	0
d05189	d05189	d05189	E3	E2	YES	osa	FBgn0261885	42130	ARID1A	8289	11
d05337	d05337	d05337	E2	E2	YES	GATAd	FBgn0032223	34395	GATA4	2626	3
d05358	d05358	d05358	E3	E3	YES	Mrp4	FBgn0263316	41387	ABCC4	10257	10
d05415	d05415	d05415	E3	E3	YES	esg	FBgn0001981	34903	SNAI2	6591	10
d05481	d05481	d05481	E2	E2	YES	CG2887	FBgn0030207	31978	DNAJB4	11080	6
d05521	d05521	d05521	E2	E2	YES	0	0	0	#N/A	#N/A	#N/A
d05525	d05525	d05525	E2	E3	YES	Trf4-2	FBgn0039251	42983	PAPD7	11044	10
d05590	d05590	d05590	E3	E3	YES	Dip3	FBgn0040465	53579	0	0	0
d05703	d05703	d05703	E2	E2	YES	0	0	0	#N/A	#N/A	#N/A
d05737	d05737	d05737	E3	E3	YES	Abd-B	FBgn0000015	47763	HOXD11	3237	4
d05831	d05831	d05831	E2	E2	YES	Gp150	FBgn0013272	37549	LRRC15	131578	1
d05891	d05891	d05891	E3	E2	YES	scrt	FBgn0004880	38469	SCRT1	83482	7
d05894	d05894	d05894	E2	E2	YES	dl	FBgn0260632	35047	RELA	5970	9
d05896	d05896	d05896	E2	E3	YES	0	0	0	#N/A	#N/A	#N/A
d05916	d05916	d05916	E2	E2	YES	cad	FBgn0000251	35341	CDX2	1045	11
d05930	d05930	d05930	E3	E2	YES	CG3600	FBgn0026087	31161	NR6A1	2649	6
d05939	d05939	d05939	E2	E3	YES	0	0	0	#N/A	#N/A	#N/A
d05955	d05955	d05955	E3	E3	YES	mir-311	FBgn0262402	12798127	0	0	0
d06159	d06159	d06159	E3	E3	YES	Gsc	FBgn0010323	33240	GSC	145258	6
d06237	d06237	d06237	E2	E2	YES	Act42A	FBgn0000043	35526	ACTB	60	11
d06253	d06253	d06253	E3	E3	YES	Pect	FBgn0032482	34716	PCYT2	5833	15
d06298	d06298	d06298	E3	E2	YES	0	0	0	#N/A	#N/A	#N/A
d06383	d06383	d06383	E2	E2	YES	CG11739	FBgn0037239	40552	SFXN1	94081	15
d06414	d06414	d06414	E2	E2	YES	bi	FBgn0000179	31379	TBX2	6909	11
d06467	d06467	d06467	E3	E3	YES	tj	FBgn0000964	35227	MAFB	9935	8
d06482	d06482	d06482	E2	E2	YES	sqz	FBgn0010768	42300	ZNF362	149076	3
d06592	d06592	d06592	E2	E3	YES	CG12768	FBgn0037206	40513	0	0	0
d06597	d06597	d06597	E2	E2	YES	CG42524	FBgn0260429	8674084	0	0	0
d06629	d06629	d06629	E2	E2	YES	Dl	FBgn0000463	42313	RELA	5970	9
d06634	d06634	d06634	E2	E2	YES	CR31044	FBgn0051044	10178917	0	0	0
d06644	d06644	d06644	E3	E3	YES	0	0	0	#N/A	#N/A	#N/A
d06704	d06704	d06704	E2	E2	YES	br	FBgn0000210	44505	ZBTB49	166793	1
d06711	d06711	d06711	E2	E2	YES	CG42524	FBgn0260429	8674084	0	0	0
d06713	d06713	d06713	E2	E3	YES	lama	FBgn0016031	38610	PLBD2	196463	12
d06728	d06728	d06728	E3	E3	YES	nos	FBgn0002962	42297	NANOS1	340719	9
d06750	d06750	d06750	E2	E2	YES	tal-1A	FBgn0259730	7354381	0	0	0
d06774	d06774	d06774	E2	E2	YES	wde	FBgn0027499	36133	ATF7IP	55729	11
d06859	d06859	d06859	E3	E3	YES	Blimp-1	FBgn0035625	38638	PRDM1	639	12
d06872	d06872	d06872	E3	E3	YES	ftz-f1	FBgn0001078	40045	NR5A1	2516	10
d06903	d06903	d06903	E2	E3	YES	DLP	FBgn0031820	33906	DMD	1756	12
d06938	d06938	d06938	E3	E3	YES	0	0	0	#N/A	#N/A	#N/A
d06942	d06942	d06942	E1	E2	YES	ogre	FBgn0004646	45382	0	0	0
d06973	d06973	d06973	E2	E1	YES	CG3940	FBgn0037788	41238	CA4	762	3
d07004	d07004	d07004	E2	E3	YES	Pen	FBgn0011823	34338	KPNA2	3838	11
d07144	d07144	d07144	E3	E3	YES	0	0	0	#N/A	#N/A	#N/A
d07203	d07203	d07203	E2	E2	YES	gem	FBgn0050011	36064	TFCP2	7024	12
d07251	d07251	d07251	E3	E2	YES	0	0	0	#N/A	#N/A	#N/A
d07339	d07339	d07339	E2	E3	YES	slv	FBgn0025469	35773	SLC50A1	55974	12
d07366	d07366	d07366	E2	E2	YES	Dsp1	FBgn0011764	117294	HMGB2	3148	12
d07382	d07382	d07382	E1	E2	YES	CG17556	FBgn0038462	42046	EMC2	9694	13
d07386	d07386	d07386	E3	E2	YES	0	0	0	#N/A	#N/A	#N/A
d07463	d07463	d07463	E2	E2	YES	LS2	FBgn0034834	37681	U2AF2	11338	7
d07469	d07469	d07469	E2	E2	YES	0	0	0	#N/A	#N/A	#N/A
d07470	d07470	d07470	E2	E3	YES	Psc	FBgn0005624	36431	BMI1	648	7
d07497	d07497	d07497	E2	E1	YES	hipk	FBgn0035142	38070	HIPK1	204851	12
d07554	d07554	d07554	E3	E2	YES	0	0	0	#N/A	#N/A	#N/A
d07564	d07564	d07564	E2	E2	YES	noc	FBgn0005771	34847	ZNF503	84858	11
d07615	d07615	d07615	E2	E2	YES	0	FBgn0029775	0	#N/A	#N/A	#N/A
d07656	d07656	d07656	E2	E2	YES	0	0	0	#N/A	#N/A	#N/A
d07658	d07658	d07658	E1	E2	YES	tai	FBgn0041092	34242	NCOA3	8202	3
d07743	d07743	d07743	E3	E3	YES	0	0	0	#N/A	#N/A	#N/A
d07779	d07779	d07779	E3	E3	YES	0	0	0	#N/A	#N/A	#N/A
d07854	d07854	d07854	E2	E3	YES	l(2)k01209	FBgn0022029	36953	UCKL1	54963	13
d07872	d07872	d07872	E2	E2	YES	Indy	FBgn0036816	40049	SLC13A2	9058	13
d07875	d07875	d07875	E2	E2	YES	pirk	FBgn0034647	37468	0	0	0
d07918	d07918	d07918	E3	E3	YES	sns	FBgn0024189	44097	NPHS1	4868	14
d08102	d08102	d08102	E3	E2	YES	CG42740	FBgn0261704	10178837	0	0	0
d08140	d08140	d08140	E1	E2	YES	siz	FBgn0026179	40327	IQSEC1	9922	12
d08184	d08184	d08184	E3	E3	YES	Eip75B	FBgn0000568	39999	NR1D2	9975	5
d08197	d08197	d08197	E2	E2	YES	Cul-4	FBgn0033260	35780	CUL4A	8451	14
d08240	d08240	d08240	E2	E2	YES	Ir	FBgn0039061	42742	IGF1R	3480	12
d08264	d08264	d08264	E2	E2	YES	0	0	0	#N/A	#N/A	#N/A
d08364	d08364	d08364	E3	E3	YES	Eip75B	FBgn0000568	39999	NR1D2	9975	5
d08374	d08374	d08374	E2	E2	YES	P5cr	FBgn0015781	42284	PYCR1	5831	4
d08403	d08403	d08403	E2	E3	YES	wapl	FBgn0004655	31187	WAPL	23063	10
d08487	d08487	d08487	E3	E3	YES	pll	FBgn0010441	43283	IRAK4	51135	8
d08528	d08528	d08528	E3	E2	YES	Eip74EF	FBgn0000567	39962	ELF2	1998	8
d08561	d08561	d08561	E3	E3	YES	Kr-h1	FBgn0028420	33861	ZNF683	257101	1
d08710	d08710	d08710	E3	E3	YES	0	0	0	#N/A	#N/A	#N/A
d08812	d08812	d08812	E3	E3	YES	0	0	0	#N/A	#N/A	#N/A
d08893	d08893	d08893	E2	E2	YES	CG7372	FBgn0036522	39697	ZNF184	7738	1
d08945	d08945	d08945	E2	E2	YES	par-1	FBgn0260934	2768852	MARK3	4140	12
d09037	d09037	d09037	E2	E2	YES	CG8740	FBgn0027585	35866	0	0	0
d09065	d09065	d09065	E2	E2	YES	bgm	FBgn0027348	44117	ACSBG2	81616	14
d09157	d09157	d09157	E2	E3	YES	Mal-A5	FBgn0050359	35828	SLC3A1	6519	12
d09171	d09171	d09171	E3	E3	YES	wnd	FBgn0036896	40143	MAP3K13	9175	11
d09320	d09320	d09320	E2	E3	YES	homer	FBgn0025777	33944	HOMER2	9455	14
d09330	d09330	d09330	E2	E2	YES	sofe	FBgn0030242	32016	PRC1	9055	12
d09351	d09351	d09351	E2	E3	YES	RpL18A	FBgn0010409	36985	RPL18A	6142	14
d09356	d09356	d09356	E3	E3	YES	0	0	0	#N/A	#N/A	#N/A
d09433	d09433	d09433	E3	E3	YES	0	FBgn0026087	0	#N/A	#N/A	#N/A
d09696	d09696	d09696	E2	E3	YES	0	0	0	#N/A	#N/A	#N/A
d09745	d09745	d09745	E2	E3	YES	ps	FBgn0261552	44258	NOVA2	4858	9
d09792	d09792	d09792	E3	E3	YES	fy	FBgn0001084	34166	FUZ	80199	14
d09811	d09811	d09811	E2	E3	YES	Dek	FBgn0026533	47906	DEK	7913	7
d09859	d09859	d09859	E2	E2	YES	mir-282	FBgn0262368	12798576	0	0	0
d09874	d09874	d09874	E3	E3	YES	retn	FBgn0004795	45976	ARID3A	1820	11
d09987	d09987	d09987	E3	E3	YES	srp	FBgn0003507	41944	GATA3	2625	4
d09998	d09998	d09998	E2	E2	YES	CG13397	FBgn0014417	46386	NAGLU	4669	15
d10032	d10032	d10032	E2	E3	YES	tra2	FBgn0003742	36619	TRA2B	6434	12
d10062	d10062	d10062	E2	E1	YES	lola	FBgn0005630	44548	ZBTB20	26137	1
d10135	d10135	d10135	E3	E3	YES	dikar	FBgn0261934	38747	CECR2	27443	8
d10232	d10232	d10232	E3	E3	YES	Eip75B	FBgn0000568	39999	NR1D2	9975	5
d10252	d10252	d10252	E2	E1	YES	CG2747	FBgn0037541	40950	HEATR5B	54497	14
d10264	d10264	d10264	E3	E3	YES	Kr-h1	FBgn0028420	33861	ZNF683	257101	1
d10301	d10301	d10301	E3	E3	YES	Kr-h1	FBgn0028420	33861	ZNF683	257101	1
d10388	d10388	d10388	E2	E2	YES	Drak	FBgn0052666	32097	STK17B	9262	10
d10417	d10417	d10417	E2	E1	YES	CG13895	FBgn0035158	38087	0	0	0
d10427	d10427	d10427	E2	E2	YES	Ef1alpha48D	FBgn0000556	36271	EEF1A2	1917	12
d10444	d10444	d10444	E2	E2	YES	ftz-f1	FBgn0001078	40045	NR5A1	2516	10
d10614	d10614	d10614	E2	E1	YES	grk	FBgn0001137	34171	NRG1	3084	1
d10617	d10617	d10617	E2	E1	YES	ATPCL	FBgn0020236	36760	ACLY	47	15
d10649	d10649	d10649	E2	E2	YES	CG10777	FBgn0029979	31707	DDX5	1655	7
d10662	d10662	d10662	E2	E2	YES	bi	FBgn0000179	31379	TBX2	6909	11
d10668	d10668	d10668	E2	E3	YES	stwl	FBgn0003459	39581	MSANTD2	79684	1
d10673	d10673	d10673	E2	E2	YES	trbl	FBgn0028978	43999	TRIB2	28951	11
d10707	d10707	d10707	E3	E3	YES	0	0	0	#N/A	#N/A	#N/A
d10766	d10766	d10766	E2	E2	YES	melt	FBgn0023001	38785	VEPH1	79674	13
d10785	d10785	d10785	E2	E2	YES	CG14441	FBgn0029895	31611	0	0	0
d10824	d10824	d10824	E2	E3	YES	CG5800	FBgn0030855	32742	DDX10	1662	15
d10881	d10881	d10881	E2	E2	YES	east	FBgn0261954	46006	0	0	0
d11052	d11052	d11052	E2	E2	YES	rpr	FBgn0011706	40015	TSC1	7248	1
d11065	d11065	d11065	E3	E3	YES	CG33129	FBgn0053129	34514	TMEM214	54867	13
d11205	d11205	d11205	E3	E3	YES	puc	FBgn0243512	40958	DUSP10	11221	9
d11391	d11391	d11391	E2	E2	YES	bl	FBgn0015907	43862	0	0	0
d11485	d11485	d11485	E2	E2	YES	CG9650	FBgn0029939	31660	BCL11B	64919	10
d11500	d11500	d11500	E2	E2	YES	chn	FBgn0015371	36678	RBAK-RBAKDN	100533952	1
d11639	d11639	d11639	E2	E2	YES	0	0	0	#N/A	#N/A	#N/A
d11662	d11662	d11662	E2	E2	YES	GalNAc-T2	FBgn0030930	32836	GALNT7	51809	12
d11665	d11665	d11665	E3	E3	YES	Glut4EF	FBgn0263097	41217	ZNF704	619279	9
d11725	d11725	d11725	E3	E2	YES	gem	FBgn0050011	36064	TFCP2	7024	12
e01388	e01388	e01388	E3	E2	YES	ps	FBgn0261552	44258	NOVA2	4858	9
e01688	e01688	e01688	E2	E2	YES	vap	FBgn0003969	32569	RASA1	5921	13
e02096	e02096	e02096	E2	E2	YES	CG32016	FBgn0052016	43836	EIF4ENIF1	56478	4
f00300	f00300	f00300	E2	E2	YES	0	0	0	#N/A	#N/A	#N/A
f00391	f00391	f00391	E2	E3	YES	Psc	FBgn0005624	36431	BMI1	648	7
f00452	f00452	f00452	E2	E3	YES	NTPase	FBgn0024947	33495	ENTPD5	957	14
f00505	f00505	f00505	E2	E1	YES	CG14316	FBgn0038567	42163	0	0	0
f00552	f00552	f00552	E2	E3	YES	sfl	FBgn0020251	38736	NDST2	8509	15
f00586	f00586	f00586	E2	E2	YES	hb	FBgn0001180	41032	ZNF485	220992	1
f00706	f00706	f00706	E2	E1	YES	Dip-C	FBgn0000455	47769	PEPD	5184	15
f01098	f01098	f01098	E2	E2	YES	0	0	0	#N/A	#N/A	#N/A
f01208	f01208	f01208	E2	E2	YES	Hmt4-20	FBgn0025639	31015	KMT5B	51111	10
f01585	f01585	f01585	E1	E1	YES	0	0	0	#N/A	#N/A	#N/A
f01630	f01630	f01630	E2	E3	YES	phol	FBgn0035997	39095	YY1	7528	5
f01647	f01647	f01647	E2	E3	YES	ftz-f1	FBgn0001078	40045	NR5A1	2516	10
f02183	f02183	f02183	E2	E2	YES	0	0	0	#N/A	#N/A	#N/A
f02285	f02285	f02285	E2	E3	YES	CG3626	FBgn0029706	31377	PDPR	55066	11
f02296	f02296	f02296	E2	E2	YES	Src42A	FBgn0004603	35524	FRK	2444	14
f02565	f02565	f02565	E2	E2	YES	l(3)mbt	FBgn0002441	43288	L3MBTL3	84456	8
f02583	f02583	f02583	E1	E2	YES	Hsromega	FBgn0001234	3772547	0	0	0
f02909	f02909	f02909	E3	E3	YES	0	FBgn0026087	0	#N/A	#N/A	#N/A
f03357	f03357	f03357	E3	E3	YES	mir-311	FBgn0262402	12798127	0	0	0
f03432	f03432	f03432	E2	E2	YES	CG42788	FBgn0261859	41817	FRMPD4	9758	10
f03470	f03470	f03470	E2	E2	YES	0	0	0	#N/A	#N/A	#N/A
f03568	f03568	f03568	E2	E2	YES	CG10320	FBgn0034645	37466	NDUFB3	4709	12
f03742	f03742	f03742	E2	E3	YES	RhoGAP18B	FBgn0261461	32898	ARHGAP12	94134	2
f03877	f03877	f03877	E2	E2	YES	Psc	FBgn0005624	36431	BMI1	648	7
f04672	f04672	f04672	E2	E2	YES	Sox21a	FBgn0036411	39567	SOX21	11166	7
f05539	f05539	f05539	E2	E1	YES	CG31957	FBgn0051957	319046	EIF1AD	84285	13
f05733	f05733	f05733	E2	E3	YES	CG1815	FBgn0039863	43730	ZMYND8	23613	12
f06458	f06458	f06458	E2	E2	YES	ec	FBgn0000542	31339	USP54	159195	9
f06749	f06749	f06749	E2	E2	YES	CG17181	FBgn0035144	38072	SCRT1	83482	4
f06798	f06798	f06798	E2	E2	YES	dar1	FBgn0263239	38436	KLF5	688	5
f06803	f06803	f06803	E1	E1	YES	timeout	FBgn0038118	41615	TIMELESS	8914	12
f06821	f06821	f06821	E2	E3	YES	salr	FBgn0000287	34568	SALL4	57167	9
f07116	f07116	f07116	E2	E3	YES	CG11505	FBgn0035424	38399	LARP4	113251	8
f07123	f07123	f07123	E2	E2	YES	CG5567	FBgn0036760	39986	PGP	283871	14
f07843	f07843	f07843	E1	E1	YES	rg	FBgn0086911	44531	LRBA	987	12
c00800	c00800	c00800	S2	S3	YES	lilli	FBgn0041111	33496	AFF2	2334	9
c01016	c01016	c01016	S2	S2	YES	Nedd4	0	0	NEDD4L	23327	14
c01295	c01295	c01295	S1	S1	YES	CG42268	FBgn0259163	39145	0	0	0
c01399	c01399	c01399	S2	S2	YES	CG5199	FBgn0036994	40265	0	0	0
c02909	c02909	c02909	S1	S2	YES	corn	FBgn0259173	38786	SRRM1	10250	1
c03244	c03244	c03244	S2	S1	YES	corto	FBgn0010313	40616	0	0	0
c03467	c03467	c03467	S2	S2	YES	0	0	0	#N/A	#N/A	#N/A
c03600	c03600	c03600	S2	S2	YES	sra	FBgn0086370	47384	RCAN2	10231	13
c03635	c03635	c03635	S2	S2	YES	shn	0	0	HIVEP2	3097	8
c04205	c04205	c04205	S2	S1	YES	0	0	0	#N/A	#N/A	#N/A
c04473	c04473	c04473	S2	S2	YES	CG4393	0	0	ANKS1B	56899	11
c04522	c04522	c04522	S1	S1	YES	Ets98B	FBgn0005659	43334	SPDEF	25803	10
c04582	c04582	c04582	S2	S2	YES	0	0	0	#N/A	#N/A	#N/A
c04797	c04797	c04797	S2	S2	YES	CG15923	FBgn0038814	42443	TMEM67	91147	13
c05668	c05668	c05668	S2	S2	YES	Klp98A	FBgn0004387	43310	KIF16B	55614	11
c05849	c05849	c05849	S2	S1	YES	Ptp61F	FBgn0003138	38160	PTPN1	5770	11
c05977	c05977	c05977	S2	S1	YES	kug	0	0	FAT3	120114	14
c06293	c06293	c06293	S2	S2	YES	CG6905	FBgn0035136	38062	CDC5L	988	14
c06325	c06325	c06325	S2	S1	YES	P58IPK	FBgn0037718	41161	DNAJC3	5611	14
c06703	c06703	c06703	S1	S2	YES	cenG1A	FBgn0028509	34803	AGAP3	116988	13
c06744	c06744	c06744	S2	S2	YES	CG6752	FBgn0038296	41826	RNF123	63891	13
c07023	c07023	c07023	S2	S3	YES	0	0	0	#N/A	#N/A	#N/A
c07042	c07042	c07042	S1	S1	YES	128up	FBgn0010339	36288	DRG1	4733	15
c07155	c07155	c07155	S2	S2	YES	Prp18	FBgn0027784	42285	PRPF18	8559	15
d00048	d00048	d00048	S1	S2	YES	CG34347	FBgn0085376	5740668	EPB41L4A	64097	8
d00078	d00078	d00078	S2	S1	YES	pnt	FBgn0003118	42757	ETS1	2113	12
d00111	d00111	d00111	S1	S1	YES	CG31690	FBgn0051690	33455	TMTC2	160335	12
d00123	d00123	d00123	S2	S2	YES	trol	FBgn0261451	45320	HSPG2	3339	9
d00147	d00147	d00147	S2	S1	YES	Cyt-b5-r	FBgn0000406	35008	FADS1	3992	2
d00173	d00173	d00173	S2	S3	YES	KrT95D	FBgn0020647	42843	PACS2	23241	13
d00266	d00266	d00266	S1	S1	YES	CG10465	FBgn0033017	35488	KCTD10	83892	15
d00343	d00343	d00343	S2	S3	YES	Coop	FBgn0263240	35677	0	0	0
d00347	d00347	d00347	S1	S1	YES	Rbp	FBgn0262483	41880	RIMBP2	23504	10
d00394	d00394	d00394	S2	S2	YES	CG17841	FBgn0028480	31965	FAM57B	83723	12
d00556	d00556	d00556	S1	S2	YES	dnc	FBgn0000479	31309	PDE4D	5144	11
d00631	d00631	d00631	S3	S3	YES	0	0	0	#N/A	#N/A	#N/A
d00669	d00669	d00669	S3	S3	YES	olf413	FBgn0037153	40453	MOXD1	26002	12
d00795	d00795	d00795	S1	S1	YES	Pdp1	FBgn0016694	45588	HLF	3131	10
d00827	d00827	d00827	S2	S2	YES	flfl	FBgn0024555	41675	PPP4R3B	57223	14
d00840	d00840	d00840	S1	S2	YES	rdgA	FBgn0261549	31826	DGKZ	8525	13
d00903	d00903	d00903	S2	S3	YES	0	0	0	#N/A	#N/A	#N/A
d01064	d01064	d01064	S1	S1	YES	CG17321	FBgn0032719	35144	0	0	0
d01118	d01118	d01118	S2	S1	YES	Hsp26	FBgn0001225	39075	CRYAB	1410	7
d01138	d01138	d01138	S1	S1	YES	Tob	FBgn0028397	32574	TOB1	10140	10
d01186	d01186	d01186	S2	S1	YES	tud	FBgn0003891	37417	TDRD6	221400	6
d01226	d01226	d01226	S1	S2	YES	ferrochelatase	FBgn0024891	43757	FECH	2235	15
d01275	d01275	d01275	S3	S3	YES	0	0	0	#N/A	#N/A	#N/A
d01345	d01345	d01345	S2	S2	YES	tutl	FBgn0010473	46015	IGSF9	57549	9
d01383	d01383	d01383	S1	S1	YES	numb	FBgn0002973	34263	NUMBL	9253	12
d01446	d01446	d01446	S1	S1	YES	0	0	0	#N/A	#N/A	#N/A
d01506	d01506	d01506	S1	S1	YES	NetB	FBgn0015774	32400	NTN1	9423	11
d01623	d01623	d01623	S1	S2	YES	bel	FBgn0263231	45826	DDX3Y	8653	14
d01714	d01714	d01714	S3	S3	YES	CG7967	FBgn0035251	38204	VTA1	51534	14
d01977	d01977	d01977	S1	S1	YES	bip1	FBgn0026263	38891	0	0	0
d02255	d02255	d02255	S2	S2	YES	Gs1	FBgn0001142	33172	GLUL	2752	9
d02380	d02380	d02380	S2	S1	YES	0	0	0	#N/A	#N/A	#N/A
d02464	d02464	d02464	S2	S3	YES	CG31075	FBgn0051075	43244	ALDH2	217	7
d02712	d02712	d02712	S1	S2	YES	CG32115	FBgn0052115	317862	0	0	0
d02728	d02728	d02728	S2	S3	YES	CG9003	FBgn0033639	36244	FBXL20	84961	12
d02769	d02769	d02769	S2	S2	YES	CG13252	FBgn0037016	40289	CRIM1	51232	2
d02833	d02833	d02833	S1	S2	YES	Tbh	FBgn0010329	31718	DBH	1621	15
d02874	d02874	d02874	S1	S1	YES	CG32626	FBgn0052626	32352	AMPD2	271	13
d02983	d02983	d02983	S1	S1	YES	Lk6	FBgn0017581	44672	MKNK1	8569	10
d02986	d02986	d02986	S2	S2	YES	eIF5B	FBgn0026259	44261	EIF5B	9669	12
d03009	d03009	d03009	S3	S2	YES	CG6045	FBgn0038349	41896	XDH	7498	2
d03027	d03027	d03027	S3	S3	YES	CG43078	FBgn0262508	38981	0	0	0
d03081	d03081	d03081	S1	S1	YES	0	0	0	#N/A	#N/A	#N/A
d03090	d03090	d03090	S1	S2	YES	0	0	0	#N/A	#N/A	#N/A
d03195	d03195	d03195	S1	S1	YES	QC	FBgn0052412	38663	QPCT	25797	9
d03208	d03208	d03208	S2	S2	YES	Rgl	FBgn0026376	44115	RGL1	23179	15
d03221	d03221	d03221	S3	S3	YES	Arp5	FBgn0038576	42173	ACTR5	79913	15
d03528	d03528	d03528	S1	S2	YES	Nmdmc	FBgn0010222	47895	MTHFD2	10797	15
d03562	d03562	d03562	S3	S3	YES	Hsc70Cb	FBgn0026418	39557	HSPA4	3308	15
d03621	d03621	d03621	S1	S2	YES	upd2	FBgn0030904	32805	LEP	3952	1
d03688	d03688	d03688	S1	S3	YES	0	FBgn0029538	0	#N/A	#N/A	#N/A
d03908	d03908	d03908	S2	S3	YES	cp309	FBgn0086690	3772382	PCNT	5116	4
d04045	d04045	d04045	S1	S1	YES	Lrch	FBgn0032633	35041	LRCH2	57631	12
d04075	d04075	d04075	S2	S3	YES	NetA	FBgn0015773	32398	NTN1	9423	11
d04116	d04116	d04116	S1	S1	YES	Moe	FBgn0011661	31816	MSN	4478	14
d04176	d04176	d04176	S2	S2	YES	fz	FBgn0001085	45307	FZD1	8321	13
d04515	d04515	d04515	S2	S2	YES	CG43389	FBgn0263246	12798574	0	0	0
d04636	d04636	d04636	S2	S3	YES	CG2790	FBgn0027599	37992	DNAJC21	134218	15
d04732	d04732	d04732	S2	S2	YES	Mob2	FBgn0259481	39293	MOB2	81532	8
d04747	d04747	d04747	S1	S1	YES	for	FBgn0000721	44817	PRKG1	5592	13
d04757	d04757	d04757	S3	S3	YES	Imp	FBgn0262735	32009	IGF2BP2	10644	13
d04883	d04883	d04883	S2	S2	YES	Fur1	FBgn0004509	47220	FURIN	5045	10
d05013	d05013	d05013	S1	S1	YES	caps	FBgn0023095	39493	LRRN2	10446	5
d05055	d05055	d05055	S1	S2	YES	0	0	0	#N/A	#N/A	#N/A
d05064	d05064	d05064	S3	S3	YES	capu	FBgn0000256	33611	FMN2	56776	9
d05169	d05169	d05169	S3	S2	YES	Cpr67Fb	FBgn0036110	39225	0	0	0
d05297	d05297	d05297	S2	S1	YES	SNF4Agamma	FBgn0025803	42515	PRKAG2	51422	9
d05330	d05330	d05330	S1	S1	YES	CG5937	FBgn0029834	31537	ARFGEF3	57221	15
d05379	d05379	d05379	S1	S1	YES	CG14450	FBgn0037184	40490	TEFM	79736	8
d05438	d05438	d05438	S3	S3	YES	CG8229	FBgn0033356	35898	USPL1	10208	2
d05548	d05548	d05548	S1	S2	YES	Ddr	FBgn0053531	3346209	DDR2	4921	14
d05625	d05625	d05625	S1	S1	YES	ssx	FBgn0024987	31086	RBMS1	5937	2
d05677	d05677	d05677	S1	S1	YES	CG43164	FBgn0262720	3772015	REG1A	5967	1
d05685	d05685	d05685	S2	S1	YES	Tango14	FBgn0031312	33298	NUS1	116150	12
d05690	d05690	d05690	S2	S2	YES	bbg	FBgn0087007	39583	IL16	3603	3
d05711	d05711	d05711	S1	S1	YES	CG9769	FBgn0037270	40587	EIF3F	8665	13
d05776	d05776	d05776	S2	S3	YES	CR43314	FBgn0263019	12798160	0	0	0
d05884	d05884	d05884	S2	S1	YES	CG8036	FBgn0037607	41027	TKTL2	84076	14
d06126	d06126	d06126	S3	S3	YES	Hsc70Cb	FBgn0026418	39557	HSPA4	3308	15
d06162	d06162	d06162	S2	S2	YES	Kdm2	FBgn0037659	41090	KDM2A	22992	14
d06184	d06184	d06184	S2	S2	YES	0	0	0	#N/A	#N/A	#N/A
d06246	d06246	d06246	S1	S2	YES	CG8170	FBgn0033365	35908	TMPRSS7	344805	1
d06280	d06280	d06280	S2	S2	YES	CG32137	FBgn0052137	39537	BICDL1	92558	14
d06412	d06412	d06412	S2	S1	YES	Ras85D	FBgn0003205	41140	HRAS	3265	12
d06432	d06432	d06432	S2	S1	YES	CG14118	FBgn0036323	39465	EXOG	9941	1
d06481	d06481	d06481	S1	S1	YES	Aats-ser	FBgn0021750	41862	SARS2	54938	12
d06616	d06616	d06616	S2	S2	YES	CG11138	FBgn0030400	32205	IRF2BPL	64207	12
d06654	d06654	d06654	S2	S2	YES	CG32354	FBgn0052354	50302	SPINK5	11005	2
d06681	d06681	d06681	S1	S2	YES	Spn	FBgn0010905	46194	PPP1R9A	55607	9
d06729	d06729	d06729	S1	S1	YES	0	0	0	#N/A	#N/A	#N/A
d06730	d06730	d06730	S2	S2	YES	Kdm2	FBgn0037659	41090	KDM2A	22992	14
d06733	d06733	d06733	S2	S2	YES	Bin1	FBgn0024491	41965	SAP18	10284	14
d06890	d06890	d06890	S1	S1	YES	CG11069	FBgn0039244	42976	ABCG5	64240	12
d07098	d07098	d07098	S1	S1	YES	0	0	0	#N/A	#N/A	#N/A
d07163	d07163	d07163	S2	S1	YES	CG33158	FBgn0053158	39834	EFL1	79631	14
d07488	d07488	d07488	S2	S2	YES	Mtp	FBgn0032904	35362	MTTP	4547	14
d07570	d07570	d07570	S1	S1	YES	Eip63E	FBgn0005640	38433	CDK14	5218	12
d07840	d07840	d07840	S2	S2	YES	CG6424	FBgn0028494	37012	FAM13C	220965	5
d08071	d08071	d08071	S2	S3	YES	0	0	0	#N/A	#N/A	#N/A
d08082	d08082	d08082	S1	S1	YES	RanBPM	FBgn0262114	36102	RANBP9	10048	12
d08232	d08232	d08232	S2	S1	YES	Con	FBgn0005775	38590	LRRC4C	57689	1
d08375	d08375	d08375	S2	S2	YES	shot	FBgn0013733	36542	DST	667	9
d08551	d08551	d08551	S2	S2	YES	dre4	FBgn0002183	38248	SUPT16H	11198	14
d08566	d08566	d08566	S1	S1	YES	fus	FBgn0023441	44095	ESRP1	54845	12
d08578	d08578	d08578	S2	S2	YES	Imp	FBgn0262735	32009	IGF2BP2	10644	13
d08767	d08767	d08767	S1	S1	YES	CG14207	FBgn0031037	32955	CRYAB	1410	5
d08769	d08769	d08769	S2	S1	YES	0	0	0	#N/A	#N/A	#N/A
d09078	d09078	d09078	S2	S3	YES	for	FBgn0000721	44817	PRKG1	5592	13
d09179	d09179	d09179	S2	S1	YES	CG8004	FBgn0036920	40178	MTX2	10651	14
d09342	d09342	d09342	S1	S1	YES	Prm	FBgn0003149	39002	MYH1	4619	4
d09346	d09346	d09346	S1	S1	YES	lea	FBgn0002543	44522	ROBO1	6091	8
d09635	d09635	d09635	S2	S1	YES	boca	FBgn0004132	48986	MESD	23184	13
d09724	d09724	d09724	S1	S2	YES	CG3376	FBgn0034997	37884	SMPD1	6609	15
d09739	d09739	d09739	S1	S1	YES	CG9674	FBgn0036663	39878	DPYD	1806	1
d09937	d09937	d09937	S2	S2	YES	CG8602	FBgn0035763	38808	MFSD1	64747	14
d10005	d10005	d10005	S2	S3	YES	pyx	FBgn0035113	38037	ANKRD35	148741	1
d10223	d10223	d10223	S2	S3	YES	cp309	FBgn0086690	3772382	PCNT	5116	4
d10376	d10376	d10376	S3	S2	YES	Arc1	FBgn0033926	36595	OARD1	221443	1
d10634	d10634	d10634	S2	S2	YES	PNUTS	FBgn0053526	33270	PPP1R10	5514	8
d10687	d10687	d10687	S3	S3	YES	Rat1	FBgn0031868	33964	XRN2	22803	14
d10800	d10800	d10800	S2	S2	YES	hdc	FBgn0010113	43604	HECA	51696	12
d11666	d11666	d11666	S2	S2	YES	cp309	FBgn0086690	3772382	PCNT	5116	4
e00355	e00355	e00355	S2	S2	YES	CG6321	FBgn0036117	39233	AADAT	51166	7
e00530	e00530	e00530	S2	S2	YES	adp	FBgn0000057	37073	WDTC1	23038	14
e00651	e00651	e00651	S2	S1	YES	CG32521	FBgn0052521	33098	0	0	0
e00777	e00777	e00777	S2	S2	YES	GstS1	FBgn0010226	36927	HPGDS	27306	10
e00785	e00785	e00785	S2	S2	YES	Epac	FBgn0085421	35588	RAPGEF4	11069	15
e00985	e00985	e00985	S2	S2	YES	Hph	FBgn0264785		EGLN3	112399	12
e01238	e01238	e01238	S2	S2	YES	D12	FBgn0027490	34172	YEATS2	55689	10
e01976	e01976	e01976	S2	S2	YES	CG5342	FBgn0037916	41389	PIGN	23556	7
e02098	e02098	e02098	S2	S2	YES	CG16890	FBgn0028932	34781	FRA10AC1	118924	13
e02166	e02166	e02166	S2	S2	YES	Rbp9	FBgn0010263	33498	ELAVL4	1996	11
e02234	e02234	e02234	S1	S2	YES	rdo	FBgn0243486	35077	LRRN3	54674	1
e02236	e02236	e02236	S2	S1	YES	or	FBgn0003008	43943	AP3S1	1176	12
e02284	e02284	e02284	S3	S3	YES	CG11842	FBgn0039629	43431	CTRB2	440387	1
e02535	e02535	e02535	S2	S2	YES	CG13334	FBgn0033856	36510	LDHB	3945	7
e02580	e02580	e02580	S2	S3	YES	Dg	FBgn0034072	36773	DAG1	1605	9
e02684	e02684	e02684	S2	S1	YES	cbx	FBgn0011241	47272	AKTIP	64400	14
e02699	e02699	e02699	S3	S1	YES	CG7023	FBgn0039025	42702	USP46	64854	15
e02741	e02741	e02741	S2	S2	YES	KLHL18	FBgn0037978	41458	KLHL18	23276	13
e03409	e03409	e03409	S2	S2	YES	comm3	FBgn0259236	39696	0	0	0
e04015	e04015	e04015	S2	S2	YES	CG13319	FBgn0033781	36423	PSMG4	389362	4
e04200	e04200	e04200	S2	S2	YES	Ncoa6	FBgn0031698	33761	NCOA6	23054	6
e04545	e04545	e04545	S2	S2	YES	ade5	FBgn0020513	32228	PAICS	10606	14
f00289	f00289	f00289	S1	S1	YES	0	0	0	#N/A	#N/A	#N/A
f00303	f00303	f00303	S2	S1	YES	CG32462	FBgn0052462	318043	0	0	0
f00474	f00474	f00474	S2	S2	YES	mip40	FBgn0034430	37215	LIN37	55957	11
f01201	f01201	f01201	S2	S2	YES	Atx-1	FBgn0029907	31624	ATXN1	6310	7
f01587	f01587	f01587	S1	S1	YES	CG10011	FBgn0039590	43387	ANKRD50	57182	9
f01655	f01655	f01655	S2	S1	YES	0	0	0	#N/A	#N/A	#N/A
f01808	f01808	f01808	S2	S1	YES	dos	FBgn0016794	38321	GAB2	9846	8
f01874	f01874	f01874	S2	S1	YES	sds22	FBgn0028992	42091	PPP1R7	5510	11
f02738	f02738	f02738	S1	S1	YES	dyn-p25	FBgn0040228	34873	DCTN5	84516	12
f03242	f03242	f03242	S3	S2	YES	CG10960	FBgn0036316	39458	SLC2A8	29988	10
f03258	f03258	f03258	S2	S3	YES	ebi	FBgn0023444	33212	TBL1X	6907	15
f03361	f03361	f03361	S1	S2	YES	ranshi	FBgn0037620	41041	ZNF280A	129025	2
f03408	f03408	f03408	S1	S1	YES	jim	FBgn0027339	43924	ZNF460	10794	2
f03756	f03756	f03756	S2	S2	YES	CG10064	FBgn0035724	38761	CFAP52	146845	13
f05061	f05061	f05061	S1	S2	YES	CG42637	FBgn0261360	40153	NPR1	4881	1
f05408	f05408	f05408	S2	S3	YES	mus301	FBgn0002899	38905	HELQ	113510	14
f05617	f05617	f05617	S2	S2	YES	0	0	0	#N/A	#N/A	#N/A
f05963	f05963	f05963	S1	S2	YES	0	0	0	#N/A	#N/A	#N/A
f05982	f05982	f05982	S1	S1	YES	CG33158	FBgn0053158	39834	EFL1	79631	14
f06012	f06012	f06012	S1	S1	YES	CG6678	FBgn0038917	42581	RCCD1	91433	11
f06188	f06188	f06188	S1	S1	YES	mub	FBgn0262737	40436	PCBP3	54039	14
f06453	f06453	f06453	S1	S1	YES	0	0	0	#N/A	#N/A	#N/A
f06593	f06593	f06593	S3	S3	YES	RpS16	FBgn0034743	37580	RPS16	6217	14
f06630	f06630	f06630	S1	S1	YES	Optix	FBgn0025360	44108	SIX3	6496	10
f07111	f07111	f07111	S2	S2	YES	Arp5	FBgn0038576	42173	ACTR5	79913	15
f07368	f07368	f07368	S2	S1	YES	CG14229	FBgn0031059	32980	0	0	0
f07572	f07572	f07572	S3	S1	YES	CG3499	FBgn0034792	37636	YME1L1	10730	12
f07635	f07635	f07635	S2	S1	YES	0	0	0	#N/A	#N/A	#N/A
f07709	f07709	f07709	S2	S1	YES	CG32982	FBgn0052982	34237	PLEK	5341	1
#N/A	c00136	#N/A	E1	#N/A	GMR-hFUS-specific	kuz	FBgn0259984	34772	ADAM10	102	13
#N/A	c00512	#N/A	E1	#N/A	GMR-hFUS-specific	CG31251	FBgn0051251	318645	NUDCD3	23386	14
#N/A	c01238	#N/A	E3	#N/A	GMR-hFUS-specific	poe	FBgn0011230	46243	UBR4	23352	15
#N/A	c03327	#N/A	E2	#N/A	GMR-hFUS-specific	nmo	FBgn0011817	38890	NLK	51701	12
#N/A	c03921	#N/A	E1	#N/A	GMR-hFUS-specific	CG7692	FBgn0036714	39934	0	0	0
#N/A	c05432	#N/A	E1	#N/A	GMR-hFUS-specific	crc	FBgn0000370	47767	ATF4	468	4
#N/A	c05822	#N/A	E2	#N/A	GMR-hFUS-specific	CG13397	FBgn0014417	46386	NAGLU	4669	15
#N/A	c06225	#N/A	E1	#N/A	GMR-hFUS-specific	kkv	FBgn0001311	45884	HAS1	3036	3
#N/A	c06350	#N/A	E2	#N/A	GMR-hFUS-specific	Rapgap1	FBgn0085403	34032	RAP1GAP2	23108	10
#N/A	c06493	#N/A	E1	#N/A	GMR-hFUS-specific	Doa	FBgn0259220	43415	CLK2	1196	11
#N/A	c06514	#N/A	E2	#N/A	GMR-hFUS-specific	Klc	FBgn0010235	39445	KLC1	3831	13
#N/A	d00009	#N/A	E2	#N/A	GMR-hFUS-specific	0	FBgn0260966	0	#N/A	#N/A	#N/A
#N/A	d00013	#N/A	E1	#N/A	GMR-hFUS-specific	Tom	FBgn0026320	39619	0	0	0
#N/A	d00129	#N/A	E2	#N/A	GMR-hFUS-specific	CG13204	FBgn0033627	36227	0	0	0
#N/A	d00335	#N/A	E2	#N/A	GMR-hFUS-specific	0	FBgn0086689	0	#N/A	#N/A	#N/A
#N/A	d00555	#N/A	E2	#N/A	GMR-hFUS-specific	0	0	0	#N/A	#N/A	#N/A
#N/A	d00577	#N/A	E3	#N/A	GMR-hFUS-specific	jim	FBgn0027339	43924	ZNF460	10794	2
#N/A	d00714	#N/A	E2	#N/A	GMR-hFUS-specific	CG31145	FBgn0051145	42784	FAM20C	56975	9
#N/A	d00901	#N/A	E2	#N/A	GMR-hFUS-specific	MTA1-like	FBgn0027951	40693	MTA3	57504	13
#N/A	d01137	#N/A	E2	#N/A	GMR-hFUS-specific	heph	FBgn0011224	48571	PTBP1	5725	12
#N/A	d01291	#N/A	E1	#N/A	GMR-hFUS-specific	ras	FBgn0003204	43873	IMPDH1	3614	13
#N/A	d01462	#N/A	E2	#N/A	GMR-hFUS-specific	CG10898	FBgn0037911	41384	NUDT18	79873	10
#N/A	d01716	#N/A	E2	#N/A	GMR-hFUS-specific	0	0	0	#N/A	#N/A	#N/A
#N/A	d01815	#N/A	E2	#N/A	GMR-hFUS-specific	inaE	FBgn0261244	32343	DAGLA	747	14
#N/A	d01963	#N/A	E1	#N/A	GMR-hFUS-specific	SK	FBgn0029761	31456	KCNN2	3781	9
#N/A	d02012	#N/A	E2	#N/A	GMR-hFUS-specific	upd3	FBgn0053542	3346149	0	0	0
#N/A	d02077	#N/A	E1	#N/A	GMR-hFUS-specific	pros	FBgn0004595	41363	PROX1	5629	10
#N/A	d02139	#N/A	E2	#N/A	GMR-hFUS-specific	CG8446	FBgn0034089	36795	LIPT1	51601	1
#N/A	d02201	#N/A	E2	#N/A	GMR-hFUS-specific	Dl	FBgn0000463	42313	RELA	5970	9
#N/A	d02281	#N/A	E2	#N/A	GMR-hFUS-specific	CHKov1	FBgn0045761	43067	0	0	0
#N/A	d02678	#N/A	E2	#N/A	GMR-hFUS-specific	CG5036	FBgn0028743	37037	RGS17	26575	11
#N/A	d02752	#N/A	E2	#N/A	GMR-hFUS-specific	0	0	0	#N/A	#N/A	#N/A
#N/A	d02796	#N/A	E1	#N/A	GMR-hFUS-specific	0	0	0	#N/A	#N/A	#N/A
#N/A	d02814	#N/A	E1	#N/A	GMR-hFUS-specific	Rapgap1	FBgn0085403	34032	RAP1GAP2	23108	10
#N/A	d03038	#N/A	E2	#N/A	GMR-hFUS-specific	ken	FBgn0011236	37785	BCL11B	64919	1
#N/A	d03052	#N/A	E2	#N/A	GMR-hFUS-specific	0	0	0	#N/A	#N/A	#N/A
#N/A	d03158	#N/A	E1	#N/A	GMR-hFUS-specific	CG12769	FBgn0033252	35770	IKZF2	22807	3
#N/A	d03251	#N/A	E2	#N/A	GMR-hFUS-specific	trbl	FBgn0028978	43999	TRIB2	28951	11
#N/A	d03296	#N/A	E2	#N/A	GMR-hFUS-specific	shot	FBgn0013733	36542	DST	667	9
#N/A	d03544	#N/A	E2	#N/A	GMR-hFUS-specific	CG8557	FBgn0030842	32729	ARHGEF10L	55160	9
#N/A	d03549	#N/A	E2	#N/A	GMR-hFUS-specific	Mmp1	FBgn0035049	37949	MMP14	4323	7
#N/A	d03798	#N/A	E3	#N/A	GMR-hFUS-specific	CG31523	FBgn0051523	326148	ELOVL7	79993	10
#N/A	d04061	#N/A	E2	#N/A	GMR-hFUS-specific	ctp	FBgn0011760	31405	DYNLL2	140735	13
#N/A	d04118	#N/A	E2	#N/A	GMR-hFUS-specific	CG43102	FBgn0262562	42137	ARHGEF17	9828	8
#N/A	d04283	#N/A	E1	#N/A	GMR-hFUS-specific	CG42404	FBgn0259823	41842	DGCR2	9993	1
#N/A	d04335	#N/A	E2	#N/A	GMR-hFUS-specific	CG3036	FBgn0031645	33695	SLC17A5	26503	3
#N/A	d04443	#N/A	E2	#N/A	GMR-hFUS-specific	aop	FBgn0000097	33392	ETV6	2120	11
#N/A	d04451	#N/A	E2	#N/A	GMR-hFUS-specific	jumu	FBgn0015396	41265	FOXN4	121643	5
#N/A	d04456	#N/A	E2	#N/A	GMR-hFUS-specific	skpA	FBgn0025637	31016	SKP1	6500	14
#N/A	d04523	#N/A	E1	#N/A	GMR-hFUS-specific	Rga	FBgn0017550	40683	CNOT2	4848	11
#N/A	d04526	#N/A	E2	#N/A	GMR-hFUS-specific	CG5953	FBgn0032587	34985	0	0	0
#N/A	d04575	#N/A	E2	#N/A	GMR-hFUS-specific	CG15236	FBgn0033108	35595	0	0	0
#N/A	d04784	#N/A	E1	#N/A	GMR-hFUS-specific	Mnt	FBgn0023215	31331	MNT	4335	6
#N/A	d04846	#N/A	E2	#N/A	GMR-hFUS-specific	ftz-f1	FBgn0001078	40045	NR5A1	2516	10
#N/A	d05010	#N/A	E2	#N/A	GMR-hFUS-specific	l(3)neo38	FBgn0086910	41423	SP3	6670	2
#N/A	d05421	#N/A	E2	#N/A	GMR-hFUS-specific	0	FBgn0262907	0	#N/A	#N/A	#N/A
#N/A	d05551	#N/A	E1	#N/A	GMR-hFUS-specific	Indy	FBgn0036816	40049	SLC13A2	9058	13
#N/A	d05712	#N/A	E3	#N/A	GMR-hFUS-specific	CR43334	FBgn0263039	12798545	0	0	0
#N/A	d05801	#N/A	E2	#N/A	GMR-hFUS-specific	Jupiter	FBgn0051363	41392	JPT1	51155	3
#N/A	d05849	#N/A	E2	#N/A	GMR-hFUS-specific	chm	FBgn0028387	43928	KAT7	11143	12
#N/A	d05851	#N/A	E2	#N/A	GMR-hFUS-specific	Syt1	FBgn0004242	33473	SYT1	6857	13
#N/A	d05868	#N/A	E2	#N/A	GMR-hFUS-specific	mbc	FBgn0015513	42817	DOCK1	1793	12
#N/A	d05874	#N/A	E3	#N/A	GMR-hFUS-specific	CG9932	FBgn0262160	34701	ZNF462	58499	2
#N/A	d06444	#N/A	E1	#N/A	GMR-hFUS-specific	0	0	0	#N/A	#N/A	#N/A
#N/A	d06489	#N/A	E2	#N/A	GMR-hFUS-specific	chas	FBgn0263258	32748	0	0	0
#N/A	d06504	#N/A	E2	#N/A	GMR-hFUS-specific	0	0	0	#N/A	#N/A	#N/A
#N/A	d06626	#N/A	E2	#N/A	GMR-hFUS-specific	0	0	0	#N/A	#N/A	#N/A
#N/A	d06642	#N/A	E2	#N/A	GMR-hFUS-specific	Pde8	FBgn0034886	37741	PDE8B	8622	13
#N/A	d07196	#N/A	E2	#N/A	GMR-hFUS-specific	0	0	0	#N/A	#N/A	#N/A
#N/A	d07298	#N/A	E2	#N/A	GMR-hFUS-specific	0	0	0	#N/A	#N/A	#N/A
#N/A	d07303	#N/A	E2	#N/A	GMR-hFUS-specific	raw	FBgn0003209	44851	RNASEL	6041	1
#N/A	d07411	#N/A	E2	#N/A	GMR-hFUS-specific	CTPsyn	FBgn0262707	39645	CTPS1	1503	14
#N/A	d07431	#N/A	E2	#N/A	GMR-hFUS-specific	CG9095	FBgn0030617	32447	SELP	6403	2
#N/A	d07970	#N/A	E3	#N/A	GMR-hFUS-specific	0	0	0	#N/A	#N/A	#N/A
#N/A	d08411	#N/A	E2	#N/A	GMR-hFUS-specific	Rbp6	FBgn0260943	39919	MSI2	124540	14
#N/A	d08462	#N/A	E2	#N/A	GMR-hFUS-specific	lost	FBgn0037245	40559	MTHFSD	64779	14
#N/A	d08499	#N/A	E1	#N/A	GMR-hFUS-specific	0	0	0	#N/A	#N/A	#N/A
#N/A	d08967	#N/A	E2	#N/A	GMR-hFUS-specific	Trx-2	FBgn0040070	34281	TXN	7295	13
#N/A	d09395	#N/A	E1	#N/A	GMR-hFUS-specific	CG8547	FBgn0033919	36586	0	0	0
#N/A	d09706	#N/A	E2	#N/A	GMR-hFUS-specific	E(Pc)	FBgn0000581	36238	EPC1	80314	11
#N/A	d10097	#N/A	E1	#N/A	GMR-hFUS-specific	CG5316	FBgn0038704	42322	APTX	54840	10
#N/A	d10771	#N/A	E2	#N/A	GMR-hFUS-specific	Sdc	FBgn0010415	37447	SDC2	6383	7
#N/A	d11099	#N/A	E2	#N/A	GMR-hFUS-specific	0	0	0	#N/A	#N/A	#N/A
#N/A	d11403	#N/A	E2	#N/A	GMR-hFUS-specific	Oatp30B	FBgn0032123	34268	SLCO5A1	81796	10
#N/A	e00312	#N/A	E1	#N/A	GMR-hFUS-specific	0	0	0	#N/A	#N/A	#N/A
#N/A	e01788	#N/A	E1	#N/A	GMR-hFUS-specific	CG17838	FBgn0038826	42460	SYNCRIP	10492	12
#N/A	e01958	#N/A	E1	#N/A	GMR-hFUS-specific	CG16718	FBgn0038721	42340	ANO1	55107	9
#N/A	e02949	#N/A	E2	#N/A	GMR-hFUS-specific	Samuel	FBgn0032330	34530	SAMD11	148398	5
#N/A	e03064	#N/A	E1	#N/A	GMR-hFUS-specific	Tsp42Eq	FBgn0033138	35628	CD63	967	1
#N/A	e04482	#N/A	E3	#N/A	GMR-hFUS-specific	CG11526	FBgn0035437	38412	STRIP1	85369	14
#N/A	e04611	#N/A	E2	#N/A	GMR-hFUS-specific	jing	FBgn0086655	35555	AEBP2	121536	6
#N/A	f00595	#N/A	E2	#N/A	GMR-hFUS-specific	CG32944	FBgn0052944	40560	STK32B	55351	12
#N/A	f00799	#N/A	E3	#N/A	GMR-hFUS-specific	Tor	FBgn0021796	47396	MTOR	2475	15
#N/A	f00897	#N/A	E2	#N/A	GMR-hFUS-specific	Fs	FBgn0259878	2768836	FST	10468	10
#N/A	f00995	#N/A	E2	#N/A	GMR-hFUS-specific	CG13723	FBgn0036705	39925	0	0	0
#N/A	f01485	#N/A	E1	#N/A	GMR-hFUS-specific	0	FBgn0028428	0	#N/A	#N/A	#N/A
#N/A	f01799	#N/A	E2	#N/A	GMR-hFUS-specific	Cyp9f2	FBgn0038037	41520	CYP3A4	1576	11
#N/A	f01862	#N/A	E2	#N/A	GMR-hFUS-specific	Spargel	FBgn0037248	40562	PPRC1	23082	6
#N/A	f02497	#N/A	E1	#N/A	GMR-hFUS-specific	CG34357	FBgn0085386	5740349	GUCY2D	3000	8
#N/A	f02630	#N/A	E2	#N/A	GMR-hFUS-specific	CG31523	FBgn0051523	326148	ELOVL7	79993	10
#N/A	f02936	#N/A	E2	#N/A	GMR-hFUS-specific	dpr8	FBgn0052600	32387	0	0	0
#N/A	f03281	#N/A	E2	#N/A	GMR-hFUS-specific	cv-2	FBgn0000395	45280	BMPER	168667	11
#N/A	f03458	#N/A	E2	#N/A	GMR-hFUS-specific	0	0	0	#N/A	#N/A	#N/A
#N/A	f03793	#N/A	E1	#N/A	GMR-hFUS-specific	Hus1-like	FBgn0026417	40598	HUS1	3364	12
#N/A	f04262	#N/A	E1	#N/A	GMR-hFUS-specific	CG18555; CG34406; Dmel_CG34406	FBgn0085435	33536	#N/A	#N/A	#N/A
#N/A	f04395	#N/A	E2	#N/A	GMR-hFUS-specific	nrv3	FBgn0032946	35408	ATP1B1	481	13
#N/A	f04689	#N/A	E2	#N/A	GMR-hFUS-specific	CG34357	FBgn0085386	5740349	GUCY2D	3000	8
#N/A	f04705	#N/A	E1	#N/A	GMR-hFUS-specific	msl-2	FBgn0005616	33565	MSL2	55167	12
#N/A	f04805	#N/A	E1	#N/A	GMR-hFUS-specific	psq	FBgn0263102	36118	BACH2	60468	1
#N/A	f04854	#N/A	E2	#N/A	GMR-hFUS-specific	B4	FBgn0023407	34767	0	0	0
#N/A	f05068	#N/A	E1	#N/A	GMR-hFUS-specific	CG4733	FBgn0038744	42368	PPP2R3B	28227	11
#N/A	f05071	#N/A	E2	#N/A	GMR-hFUS-specific	CG9804	FBgn0037251	40565	LIPT2	387787	15
#N/A	f05121	#N/A	E1	#N/A	GMR-hFUS-specific	Cpsf160	FBgn0024698	44250	CPSF1	29894	14
#N/A	f05251	#N/A	E2	#N/A	GMR-hFUS-specific	0	0	0	#N/A	#N/A	#N/A
#N/A	f05703	#N/A	E2	#N/A	GMR-hFUS-specific	rpk	FBgn0022981	40580	ASIC2	40	5
#N/A	f05894	#N/A	E2	#N/A	GMR-hFUS-specific	Poxm	FBgn0003129	40990	PAX9	5083	12
#N/A	f06189	#N/A	E2	#N/A	GMR-hFUS-specific	JIL-1	FBgn0020412	39241	RPS6KA5	9252	10
#N/A	f06304	#N/A	E2	#N/A	GMR-hFUS-specific	0	0	0	#N/A	#N/A	#N/A
#N/A	f07042	#N/A	E2	#N/A	GMR-hFUS-specific	CG5888	FBgn0028523	34980	LRRC52	440699	1
#N/A	f07293	#N/A	E2	#N/A	GMR-hFUS-specific	0	0	0	#N/A	#N/A	#N/A
#N/A	f07434	#N/A	E1	#N/A	GMR-hFUS-specific	mew	FBgn0004456	32275	ITGA6	3655	12
#N/A	f07730	#N/A	E2	#N/A	GMR-hFUS-specific	CG10445	FBgn0037531	40938	TTF2	8458	7
#N/A	f08085	#N/A	E3	#N/A	GMR-hFUS-specific	rk	FBgn0003255	34819	LGR5	8549	8
#N/A	c00167	#N/A	S1	#N/A	GMR-hFUS-specific	0	0	0	#N/A	#N/A	#N/A
#N/A	c00275	#N/A	S2	#N/A	GMR-hFUS-specific	psq	FBgn0263102	36118	BACH2	60468	1
#N/A	c00586	#N/A	S2	#N/A	GMR-hFUS-specific	CG8668	FBgn0031988	34107	B3GALT1	8708	6
#N/A	c00716	#N/A	S2	#N/A	GMR-hFUS-specific	CG11873	FBgn0039633	43435	BICRA	29998	3
#N/A	c01023	#N/A	S2	#N/A	GMR-hFUS-specific	Sin3A	FBgn0022764	36382	SIN3A	25942	12
#N/A	c02353	#N/A	S1	#N/A	GMR-hFUS-specific	0	0	0	#N/A	#N/A	#N/A
#N/A	c02429	#N/A	S2	#N/A	GMR-hFUS-specific	zormin	FBgn0052311	2769001	CCDC141	285025	3
#N/A	c03090	#N/A	S2	#N/A	GMR-hFUS-specific	0	0	0	#N/A	#N/A	#N/A
#N/A	c03495	#N/A	S2	#N/A	GMR-hFUS-specific	cdc2	FBgn0004106	34411	CDK1	983	12
#N/A	c04166	#N/A	S2	#N/A	GMR-hFUS-specific	Hsp68	FBgn0001230	42852	HSPA1B	3304	6
#N/A	c04366	#N/A	S1	#N/A	GMR-hFUS-specific	Indy	FBgn0036816	40049	SLC13A2	9058	13
#N/A	c04716	#N/A	S2	#N/A	GMR-hFUS-specific	0	0	0	#N/A	#N/A	#N/A
#N/A	c04820	#N/A	S1	#N/A	GMR-hFUS-specific	Dad	FBgn0020493	42059	SMAD7	4092	7
#N/A	c05020	#N/A	S2	#N/A	GMR-hFUS-specific	sls	FBgn0086906	44013	TTN	7273	3
#N/A	c05391	#N/A	S1	#N/A	GMR-hFUS-specific	mbc	FBgn0015513	42817	DOCK1	1793	12
#N/A	c06245	#N/A	S1	#N/A	GMR-hFUS-specific	Spn	FBgn0010905	46194	PPP1R9A	55607	9
#N/A	c06503	#N/A	S2	#N/A	GMR-hFUS-specific	CG5886	FBgn0039379	43125	TXLNA	200081	13
#N/A	d00097	#N/A	S1	#N/A	GMR-hFUS-specific	fog	FBgn0000719	33148	NECAP2	55707	1
#N/A	d00121	#N/A	S1	#N/A	GMR-hFUS-specific	C1GalTA	FBgn0032078	34215	C1GALT1	56913	14
#N/A	d00158	#N/A	S1	#N/A	GMR-hFUS-specific	0	0	0	#N/A	#N/A	#N/A
#N/A	d00453	#N/A	S1	#N/A	GMR-hFUS-specific	blow	FBgn0004133	35694	CA3	761	1
#N/A	d00875	#N/A	S1	#N/A	GMR-hFUS-specific	CHES-1-like	FBgn0029504	31678	FOXN3	1112	6
#N/A	d00933	#N/A	S1	#N/A	GMR-hFUS-specific	CG3036	FBgn0031645	33695	SLC17A5	26503	3
#N/A	d01047	#N/A	S1	#N/A	GMR-hFUS-specific	Bx	FBgn0000242	32846	LMO1	4004	9
#N/A	d01063	#N/A	S2	#N/A	GMR-hFUS-specific	mam	FBgn0002643	36555	MAML1	9794	2
#N/A	d01609	#N/A	S1	#N/A	GMR-hFUS-specific	l(1)dd4	FBgn0001612	48481	TUBGCP3	10426	14
#N/A	d01879	#N/A	S1	#N/A	GMR-hFUS-specific	Pdp1	FBgn0016694	45588	HLF	3131	10
#N/A	d01894	#N/A	S2	#N/A	GMR-hFUS-specific	Tsp39D	FBgn0032943	35405	CD63	967	9
#N/A	d02050	#N/A	S2	#N/A	GMR-hFUS-specific	Bx	FBgn0000242	32846	LMO1	4004	9
#N/A	d02558	#N/A	S1	#N/A	GMR-hFUS-specific	0	0	0	#N/A	#N/A	#N/A
#N/A	d02702	#N/A	S3	#N/A	GMR-hFUS-specific	CG3777	FBgn0024989	30979	0	0	0
#N/A	d02995	#N/A	S1	#N/A	GMR-hFUS-specific	CG12341	FBgn0033550	36137	TMEM170A	124491	14
#N/A	d03302	#N/A	S1	#N/A	GMR-hFUS-specific	pxb	FBgn0053207	41899	0	0	0
#N/A	d03683	#N/A	S1	#N/A	GMR-hFUS-specific	Nos	FBgn0011676	34495	NANOS1	340719	9
#N/A	d03723	#N/A	S1	#N/A	GMR-hFUS-specific	Sema-5c	FBgn0250876	37066	SEMA5B	54437	13
#N/A	d03868	#N/A	S1	#N/A	GMR-hFUS-specific	Crc	FBgn0005585	41166	ATF4	468	4
#N/A	d04076	#N/A	S1	#N/A	GMR-hFUS-specific	CG5707	FBgn0026593	48422	SERHL2	253190	9
#N/A	d05144	#N/A	S1	#N/A	GMR-hFUS-specific	stet	FBgn0020248	38169	RHBDL3	162494	13
#N/A	d05172	#N/A	S2	#N/A	GMR-hFUS-specific	Hrb98DE	FBgn0001215	43385	HNRNPA2B1	3181	13
#N/A	d05195	#N/A	S1	#N/A	GMR-hFUS-specific	CG8965	FBgn0031745	33814	0	0	0
#N/A	d05202	#N/A	S1	#N/A	GMR-hFUS-specific	CG31038	FBgn0051038	43535	0	0	0
#N/A	d05318	#N/A	S1	#N/A	GMR-hFUS-specific	RpS2	FBgn0004867	34309	RPS2	6187	13
#N/A	d05666	#N/A	S1	#N/A	GMR-hFUS-specific	0	0	0	#N/A	#N/A	#N/A
#N/A	d05846	#N/A	S1	#N/A	GMR-hFUS-specific	CG11426	FBgn0037166	40471	PLPP2	8612	9
#N/A	d05927	#N/A	S1	#N/A	GMR-hFUS-specific	0	0	0	#N/A	#N/A	#N/A
#N/A	d05998	#N/A	S2	#N/A	GMR-hFUS-specific	CG11163	FBgn0025693	35513	SLC30A4	7782	5
#N/A	d06218	#N/A	S2	#N/A	GMR-hFUS-specific	mnd	FBgn0002778	39625	SLC7A7	9056	9
#N/A	d06586	#N/A	S1	#N/A	GMR-hFUS-specific	corn	FBgn0259173	38786	SRRM1	10250	1
#N/A	d08219	#N/A	S1	#N/A	GMR-hFUS-specific	lilli	FBgn0041111	33496	AFF2	2334	9
#N/A	d08761	#N/A	S1	#N/A	GMR-hFUS-specific	0	0	0	#N/A	#N/A	#N/A
#N/A	d09025	#N/A	S1	#N/A	GMR-hFUS-specific	Plap	FBgn0024314	43978	PLAA	9373	14
#N/A	d09050	#N/A	S1	#N/A	GMR-hFUS-specific	drd	FBgn0260006	318102	0	0	0
#N/A	d09160	#N/A	S1	#N/A	GMR-hFUS-specific	CG5704	FBgn0026570	48613	SERHL2	253190	10
#N/A	d09248	#N/A	S1	#N/A	GMR-hFUS-specific	CG31324	FBgn0051324	43177	0	0	0
#N/A	d09327	#N/A	S1	#N/A	GMR-hFUS-specific	CG15270	FBgn0028879	34886	ANO8	57719	12
#N/A	d09486	#N/A	S2	#N/A	GMR-hFUS-specific	Ranbp21	FBgn0031051	32970	XPO5	57510	14
#N/A	d09513	#N/A	S1	#N/A	GMR-hFUS-specific	CG13168	FBgn0033705	36327	IQCD	115811	7
#N/A	d09632	#N/A	S1	#N/A	GMR-hFUS-specific	CG12207	FBgn0038220	41738	LYSMD2	256586	9
#N/A	d09678	#N/A	S1	#N/A	GMR-hFUS-specific	0	0	0	#N/A	#N/A	#N/A
#N/A	d09902	#N/A	S1	#N/A	GMR-hFUS-specific	CanB	FBgn0010014	44317	PPP3R1	5534	10
#N/A	d10029	#N/A	S1	#N/A	GMR-hFUS-specific	HDAC4	FBgn0041210	32278	HDAC4	9759	10
#N/A	d10122	#N/A	S2	#N/A	GMR-hFUS-specific	CG4496	FBgn0031894	34000	ZNF655	79027	1
#N/A	d10201	#N/A	S2	#N/A	GMR-hFUS-specific	mam	FBgn0002643	36555	MAML1	9794	2
#N/A	d10246	#N/A	S1	#N/A	GMR-hFUS-specific	ago	FBgn0041171	38516	FBXW7	55294	8
#N/A	d10314	#N/A	S1	#N/A	GMR-hFUS-specific	CG33093	FBgn0053093	42654	0	0	0
#N/A	d10506	#N/A	S1	#N/A	GMR-hFUS-specific	dlp	FBgn0041604	39596	DMD	1756	12
#N/A	d10778	#N/A	S1	#N/A	GMR-hFUS-specific	CG15260	FBgn0028850	34899	0	0	0
#N/A	d11075	#N/A	S1	#N/A	GMR-hFUS-specific	CG17321	FBgn0032719	35144	0	0	0
#N/A	d11402	#N/A	S2	#N/A	GMR-hFUS-specific	0	0	0	#N/A	#N/A	#N/A
#N/A	d11406	#N/A	S1	#N/A	GMR-hFUS-specific	chb	FBgn0021760	43901	CLASP1	23332	15
#N/A	d11585	#N/A	S1	#N/A	GMR-hFUS-specific	0	0	0	#N/A	#N/A	#N/A
#N/A	e00019	#N/A	S2	#N/A	GMR-hFUS-specific	olf186-F	FBgn0041585	37040	ORAI3	93129	9
#N/A	e00254	#N/A	S3	#N/A	GMR-hFUS-specific	Hexo1	FBgn0041630	38528	HEXB	3074	8
#N/A	e00322	#N/A	S2	#N/A	GMR-hFUS-specific	pip	FBgn0003089	40104	UST	10090	6
#N/A	e00405	#N/A	S2	#N/A	GMR-hFUS-specific	Oatp30B	FBgn0032123	34268	SLCO5A1	81796	10
#N/A	e00589	#N/A	S1	#N/A	GMR-hFUS-specific	0	0	0	#N/A	#N/A	#N/A
#N/A	e00765	#N/A	S1	#N/A	GMR-hFUS-specific	CG13741	FBgn0033374	35919	0	0	0
#N/A	e00930	#N/A	S2	#N/A	GMR-hFUS-specific	kuz	FBgn0259984	34772	ADAM10	102	13
#N/A	e01232	#N/A	S2	#N/A	GMR-hFUS-specific	Fdxh	FBgn0011769	39070	FDX1L	112812	15
#N/A	e02289	#N/A	S2	#N/A	GMR-hFUS-specific	tra2	FBgn0003742	36619	TRA2B	6434	12
#N/A	e02421	#N/A	S2	#N/A	GMR-hFUS-specific	Moe	FBgn0011661	31816	MSN	4478	14
#N/A	e02476	#N/A	S2	#N/A	GMR-hFUS-specific	l(1)10Bb	FBgn0001491	32069	BUD31	8896	14
#N/A	e02477	#N/A	S1	#N/A	GMR-hFUS-specific	Pat1	FBgn0029878	31593	APPBP2	10513	15
#N/A	e02521	#N/A	S2	#N/A	GMR-hFUS-specific	oys	FBgn0033476	36045	MBOAT2	129642	15
#N/A	e02526	#N/A	S2	#N/A	GMR-hFUS-specific	0	0	0	#N/A	#N/A	#N/A
#N/A	e02898	#N/A	S2	#N/A	GMR-hFUS-specific	CG11885	FBgn0031253	33215	PSMG3	84262	3
#N/A	e03018	#N/A	S2	#N/A	GMR-hFUS-specific	Fem-1	FBgn0034542	37344	FEM1B	10116	14
#N/A	e04425	#N/A	S2	#N/A	GMR-hFUS-specific	fry	FBgn0016081	39122	FRYL	285527	13
#N/A	e04432	#N/A	S1	#N/A	GMR-hFUS-specific	Rox8	FBgn0005649	42848	TIAL1	7073	14
#N/A	f00038	#N/A	S1	#N/A	GMR-hFUS-specific	CG34109	FBgn0083945	4379890	0	0	0
#N/A	f00278	#N/A	S3	#N/A	GMR-hFUS-specific	CG4829	FBgn0030796	32672	GGT1	2678	8
#N/A	f00337	#N/A	S1	#N/A	GMR-hFUS-specific	trio	FBgn0024277	43974	TRIO	7204	12
#N/A	f00402	#N/A	S1	#N/A	GMR-hFUS-specific	CG13966	FBgn0032838	35284	0	0	0
#N/A	f00506	#N/A	S2	#N/A	GMR-hFUS-specific	0	0	0	#N/A	#N/A	#N/A
#N/A	f00535	#N/A	S2	#N/A	GMR-hFUS-specific	CG12355	FBgn0040805	2768954	MPV17L	255027	13
#N/A	f01228	#N/A	S1	#N/A	GMR-hFUS-specific	Sclp	FBgn0030357	32156	LRRC20	55222	12
#N/A	f01303	#N/A	S1	#N/A	GMR-hFUS-specific	CG14946	FBgn0032405	34627	HSD17B11	51170	4
#N/A	f01934	#N/A	S1	#N/A	GMR-hFUS-specific	Dak1	FBgn0028833	43165	CMPK1	51727	12
#N/A	f02089	#N/A	S2	#N/A	GMR-hFUS-specific	0	0	0	#N/A	#N/A	#N/A
#N/A	f02447	#N/A	S2	#N/A	GMR-hFUS-specific	0	0	0	#N/A	#N/A	#N/A
#N/A	f02778	#N/A	S2	#N/A	GMR-hFUS-specific	CG31689	FBgn0031449	326154	ABCG4	64137	6
#N/A	f02861	#N/A	S2	#N/A	GMR-hFUS-specific	0	0	0	#N/A	#N/A	#N/A
#N/A	f02873	#N/A	S2	#N/A	GMR-hFUS-specific	0	0	0	#N/A	#N/A	#N/A
#N/A	f03155	#N/A	S2	#N/A	GMR-hFUS-specific	InR	FBgn0013984	42549	IGF1R	3480	12
#N/A	f03257	#N/A	S2	#N/A	GMR-hFUS-specific	cbt	FBgn0043364	33224	KLF11	8462	5
#N/A	f03296	#N/A	S2	#N/A	GMR-hFUS-specific	CG42750	FBgn0261804	35090	DPEP2	64174	9
#N/A	f03404	#N/A	S2	#N/A	GMR-hFUS-specific	CG12950	FBgn0037736	41184	PSG1	5669	1
#N/A	f03615	#N/A	S1	#N/A	GMR-hFUS-specific	grh	FBgn0259211	37038	GRHL1	29841	8
#N/A	f03680	#N/A	S2	#N/A	GMR-hFUS-specific	c11.1	FBgn0040236	53436	MROH1	727957	13
#N/A	f03929	#N/A	S2	#N/A	GMR-hFUS-specific	0	0	0	#N/A	#N/A	#N/A
#N/A	f04167	#N/A	S1	#N/A	GMR-hFUS-specific	0	0	0	#N/A	#N/A	#N/A
#N/A	f04926	#N/A	S1	#N/A	GMR-hFUS-specific	CG6966	FBgn0038286	41816	FEM1C	56929	14
#N/A	f05147	#N/A	S2	#N/A	GMR-hFUS-specific	Cyp4p2	FBgn0033395	35946	CYP4F3	4051	4
#N/A	f05233	#N/A	S1	#N/A	GMR-hFUS-specific	Mipp1	FBgn0026061	39841	MINPP1	9562	10
#N/A	f05676	#N/A	S2	#N/A	GMR-hFUS-specific	CG5199	FBgn0036994	40265	0	0	0
#N/A	f05685	#N/A	S1	#N/A	GMR-hFUS-specific	Nrt	FBgn0004108	39873	CES2	8824	2
#N/A	f05833	#N/A	S1	#N/A	GMR-hFUS-specific	ec	FBgn0000542	31339	USP54	159195	9
#N/A	f05893	#N/A	S1	#N/A	GMR-hFUS-specific	CG9970	FBgn0035380	38351	0	0	0
#N/A	f06089	#N/A	S2	#N/A	GMR-hFUS-specific	tRNA:R:12Ee	FBgn0011952	3772515	0	0	0
#N/A	f06193	#N/A	S2	#N/A	GMR-hFUS-specific	CG12428	FBgn0039543	43332	CROT	54677	13
#N/A	f06308	#N/A	S2	#N/A	GMR-hFUS-specific	0	0	0	#N/A	#N/A	#N/A
#N/A	f06506	#N/A	S2	#N/A	GMR-hFUS-specific	slgA	FBgn0003423	33117	PRODH	5625	14
#N/A	f07311	#N/A	S2	#N/A	GMR-hFUS-specific	sgg	FBgn0003371	31248	GSK3B	2932	10
#N/A	f07317	#N/A	S1	#N/A	GMR-hFUS-specific	CG4096	FBgn0029791	31490	ADAMTS7	11173	11
#N/A	f07600	#N/A	S2	#N/A	GMR-hFUS-specific	0	0	0	#N/A	#N/A	#N/A
#N/A	f07815	#N/A	S1	#N/A	GMR-hFUS-specific	CG13004	FBgn0030797	32673	0	0	0
#N/A	f08023	#N/A	S1	#N/A	GMR-hFUS-specific	CG32816	FBgn0052816	318225	0	0	0
#N/A	f08069	#N/A	S2	#N/A	GMR-hFUS-specific	0	0	0	#N/A	#N/A	#N/A
#N/A	#N/A	d05968	#N/A	?2	GMR-hTDP-43-specific	dnr1	FBgn0260866	37575	MYLIP	29116	13
#N/A	#N/A	d06070	#N/A	?2	GMR-hTDP-43-specific	sca	FBgn0003326	36411	ANGPT4	51378	3
#N/A	#N/A	c00280	#N/A	E2	GMR-hTDP-43-specific	aret	FBgn0000114	34648	CELF2	10659	11
#N/A	#N/A	c00763	#N/A	E3	GMR-hTDP-43-specific	Rho1	FBgn0014020	36775	RHOA	387	12
#N/A	#N/A	c00788	#N/A	E1	GMR-hTDP-43-specific	simj	FBgn0010762	39212	GATAD2B	57459	9
#N/A	#N/A	c01169	#N/A	E1	GMR-hTDP-43-specific	Hsp68	FBgn0001230	42852	HSPA1B	3304	6
#N/A	#N/A	c01312	#N/A	E1	GMR-hTDP-43-specific	heph	FBgn0011224	48571	PTBP1	5725	12
#N/A	#N/A	c01774	#N/A	E1	GMR-hTDP-43-specific	0	0	0	#N/A	#N/A	#N/A
#N/A	#N/A	c01776	#N/A	E2	GMR-hTDP-43-specific	Ect4	FBgn0262579	38895	SARM1	23098	7
#N/A	#N/A	c02473	#N/A	E2	GMR-hTDP-43-specific	Fs(2)Ket	FBgn0262743	35336	KPNB1	3837	15
#N/A	#N/A	c03113	#N/A	E1	GMR-hTDP-43-specific	CadN2	FBgn0262018	35071	CDH6	1004	3
#N/A	#N/A	c03200	#N/A	E1	GMR-hTDP-43-specific	CG2698	FBgn0037536	40945	TMEM245	23731	14
#N/A	#N/A	c04213	#N/A	E2	GMR-hTDP-43-specific	CG12090	FBgn0035227	38176	DEPDC5	9681	13
#N/A	#N/A	c04726	#N/A	E1	GMR-hTDP-43-specific	hdc	FBgn0010113	43604	HECA	51696	12
#N/A	#N/A	c05852	#N/A	E1	GMR-hTDP-43-specific	CG17331	FBgn0032596	34999	PSMB2	5690	14
#N/A	#N/A	c06404	#N/A	E1	GMR-hTDP-43-specific	0	0	0	#N/A	#N/A	#N/A
#N/A	#N/A	c06813	#N/A	E2	GMR-hTDP-43-specific	CG8408	FBgn0030850	32737	TMEM41B	440026	14
#N/A	#N/A	d00379	#N/A	E2	GMR-hTDP-43-specific	Treh	FBgn0003748	45368	TREH	11181	14
#N/A	#N/A	d01042	#N/A	E2	GMR-hTDP-43-specific	0	0	0	#N/A	#N/A	#N/A
#N/A	#N/A	d01249	#N/A	E3	GMR-hTDP-43-specific	sqz	FBgn0010768	42300	ZNF362	149076	3
#N/A	#N/A	d02075	#N/A	E3	GMR-hTDP-43-specific	svp	FBgn0003651	41491	NR2F2	7026	10
#N/A	#N/A	d02540	#N/A	E1	GMR-hTDP-43-specific	ps	FBgn0261552	44258	NOVA2	4858	9
#N/A	#N/A	d02844	#N/A	E2	GMR-hTDP-43-specific	l(2)k16918	FBgn0021800	47399	0	0	0
#N/A	#N/A	d03960	#N/A	E1	GMR-hTDP-43-specific	by	FBgn0000244	41144	TNS3	64759	7
#N/A	#N/A	d04144	#N/A	E3	GMR-hTDP-43-specific	Blimp-1	FBgn0035625	38638	PRDM1	639	12
#N/A	#N/A	d04576	#N/A	E2	GMR-hTDP-43-specific	Atpalpha	FBgn0002921	48971	ATP1A3	478	13
#N/A	#N/A	d05217	#N/A	E3	GMR-hTDP-43-specific	CG12163	FBgn0260462	40628	CTSF	8722	10
#N/A	#N/A	d05357	#N/A	E3	GMR-hTDP-43-specific	Top2	FBgn0003732	35225	TOP2A	7153	14
#N/A	#N/A	d06523	#N/A	E1	GMR-hTDP-43-specific	Bsg	FBgn0261822	318841	NPTN	27020	6
#N/A	#N/A	d07565	#N/A	E1	GMR-hTDP-43-specific	CG4068	FBgn0029738	31424	SINHCAF	58516	10
#N/A	#N/A	d09165	#N/A	E3	GMR-hTDP-43-specific	sas	FBgn0002306	40861	WISP1	8840	1
#N/A	#N/A	d09339	#N/A	E2	GMR-hTDP-43-specific	CG12814	FBgn0037796	41246	0	0	0
#N/A	#N/A	d09860	#N/A	E2	GMR-hTDP-43-specific	twin	FBgn0011725	42880	CNOT6L	246175	14
#N/A	#N/A	d11117	#N/A	E2	GMR-hTDP-43-specific	l(1)G0222	FBgn0028343	32732	ANKLE2	23141	8
#N/A	#N/A	d11324	#N/A	E2	GMR-hTDP-43-specific	siz	FBgn0026179	40327	IQSEC1	9922	12
#N/A	#N/A	e00499	#N/A	E1	GMR-hTDP-43-specific	CG32529	FBgn0052529	33000	BAHD1	22893	7
#N/A	#N/A	e01258	#N/A	E2	GMR-hTDP-43-specific	app	FBgn0260941	39399	ZDHHC14	79683	10
#N/A	#N/A	e01779	#N/A	E1	GMR-hTDP-43-specific	elgi	FBgn0036546	39735	RNF41	10193	15
#N/A	#N/A	e02432	#N/A	E1	GMR-hTDP-43-specific	rdgB	FBgn0003218	32340	PITPNM2	57605	14
#N/A	#N/A	e03117	#N/A	E1	GMR-hTDP-43-specific	Gld	FBgn0001112	40875	CHDH	55349	6
#N/A	#N/A	e04423	#N/A	E1	GMR-hTDP-43-specific	ns1	FBgn0038473	42060	GNL3L	54552	13
#N/A	#N/A	f00242	#N/A	E2	GMR-hTDP-43-specific	tlk	FBgn0086899	318206	TLK2	11011	11
#N/A	#N/A	f00825	#N/A	E1	GMR-hTDP-43-specific	hig	FBgn0010114	35949	APOH	350	2
#N/A	#N/A	f01039	#N/A	E2	GMR-hTDP-43-specific	CG32206	FBgn0052206	40105	CUBN	8029	1
#N/A	#N/A	f01410	#N/A	E2	GMR-hTDP-43-specific	CG15323	FBgn0040784	50257	0	0	0
#N/A	#N/A	f01634	#N/A	E2	GMR-hTDP-43-specific	0	0	0	#N/A	#N/A	#N/A
#N/A	#N/A	f02056	#N/A	E1	GMR-hTDP-43-specific	pncr003:2L	FBgn0047133	3772689	0	0	0
#N/A	#N/A	f03988	#N/A	E2	GMR-hTDP-43-specific	0	0	0	#N/A	#N/A	#N/A
#N/A	#N/A	f05423	#N/A	E2	GMR-hTDP-43-specific	msd1	FBgn0035209	38155	0	0	0
#N/A	#N/A	f07794	#N/A	E2	GMR-hTDP-43-specific	Pxn	FBgn0011828	38326	PXDN	7837	14
#N/A	#N/A	f07842	#N/A	E2	GMR-hTDP-43-specific	0	0	0	#N/A	#N/A	#N/A
#N/A	#N/A	c00236	#N/A	S2	GMR-hTDP-43-specific	CG10657	FBgn0036289	39423	CLVS1	157807	6
#N/A	#N/A	c00549	#N/A	S2	GMR-hTDP-43-specific	0	0	0	#N/A	#N/A	#N/A
#N/A	#N/A	c02136	#N/A	S2	GMR-hTDP-43-specific	l(2)gl	FBgn0002121	33156	LLGL1	3996	15
#N/A	#N/A	c03143	#N/A	S3	GMR-hTDP-43-specific	0	0	0	#N/A	#N/A	#N/A
#N/A	#N/A	c03290	#N/A	S1	GMR-hTDP-43-specific	Csk	FBgn0262081	41398	CSK	1445	9
#N/A	#N/A	c03837	#N/A	S2	GMR-hTDP-43-specific	CG1434	FBgn0030554	32377	DUS2	54920	13
#N/A	#N/A	c04195	#N/A	S1	GMR-hTDP-43-specific	0	0	0	#N/A	#N/A	#N/A
#N/A	#N/A	c04215	#N/A	S2	GMR-hTDP-43-specific	CG18304	FBgn0031869	33969	SOGA3	387104	4
#N/A	#N/A	c04428	#N/A	S2	GMR-hTDP-43-specific	CG32109	FBgn0052109	39444	AAGAB	79719	6
#N/A	#N/A	c05081	#N/A	S2	GMR-hTDP-43-specific	Spred	FBgn0020767	36643	SPRED2	200734	12
#N/A	#N/A	c06427	#N/A	S2	GMR-hTDP-43-specific	FK506-bp2	FBgn0013954	37214	FKBP1B	2281	12
#N/A	#N/A	d00066	#N/A	S2	GMR-hTDP-43-specific	Dp1	FBgn0027835	37116	HDLBP	3069	15
#N/A	#N/A	d00073	#N/A	S1	GMR-hTDP-43-specific	MYPT-75D	FBgn0036801	40032	PPP1R16A	84988	12
#N/A	#N/A	d00133	#N/A	S2	GMR-hTDP-43-specific	sesB	FBgn0003360	32007	SLC25A4	291	13
#N/A	#N/A	d00215	#N/A	S2	GMR-hTDP-43-specific	Hers	FBgn0052529	33000	BAHD1	22893	7
#N/A	#N/A	d00249	#N/A	S2	GMR-hTDP-43-specific	0	0	0	#N/A	#N/A	#N/A
#N/A	#N/A	d00360	#N/A	S1	GMR-hTDP-43-specific	CG6255	FBgn0038708	42326	SUCLG1	8802	11
#N/A	#N/A	d00454	#N/A	S2	GMR-hTDP-43-specific	CG9945	FBgn0034527	37329	DCAF11	80344	13
#N/A	#N/A	d00808	#N/A	S2	GMR-hTDP-43-specific	tara	FBgn0040071	53562	SERTAD2	9792	1
#N/A	#N/A	d01297	#N/A	S1	GMR-hTDP-43-specific	ltd	FBgn0002567	35940	RAB32	10981	10
#N/A	#N/A	d01360	#N/A	S1	GMR-hTDP-43-specific	otk	FBgn0004839	36283	PTK7	5754	14
#N/A	#N/A	d01487	#N/A	S1	GMR-hTDP-43-specific	jar	FBgn0011225	42889	MYO6	4646	12
#N/A	#N/A	d01701	#N/A	S2	GMR-hTDP-43-specific	CG9990	FBgn0039594	43391	ABCG2	9429	2
#N/A	#N/A	d01719	#N/A	S2	GMR-hTDP-43-specific	l(3)04053	FBgn0010830	46158	SDCCAG3	10807	1
#N/A	#N/A	d01761	#N/A	S1	GMR-hTDP-43-specific	l(1)G0289	FBgn0028331	31964	PLXDC2	84898	11
#N/A	#N/A	d01892	#N/A	S2	GMR-hTDP-43-specific	CG11034	FBgn0031741	33810	DPP4	1803	12
#N/A	#N/A	d01906	#N/A	S3	GMR-hTDP-43-specific	Rapgap1	FBgn0085403	34032	RAP1GAP2	23108	10
#N/A	#N/A	d02160	#N/A	S2	GMR-hTDP-43-specific	0	0	0	#N/A	#N/A	#N/A
#N/A	#N/A	d02162	#N/A	S3	GMR-hTDP-43-specific	0	0	0	#N/A	#N/A	#N/A
#N/A	#N/A	d02258	#N/A	S3	GMR-hTDP-43-specific	Pka-R2	FBgn0022382	36041	PRKAR2A	5576	14
#N/A	#N/A	d02388	#N/A	S3	GMR-hTDP-43-specific	ttk	FBgn0003870	48317	ZBTB45	84878	1
#N/A	#N/A	d02419	#N/A	S3	GMR-hTDP-43-specific	CG31176	FBgn0051176	42554	0	0	0
#N/A	#N/A	d02571	#N/A	S1	GMR-hTDP-43-specific	skd	FBgn0003415	43906	MED13	9969	15
#N/A	#N/A	d02989	#N/A	S1	GMR-hTDP-43-specific	Pde8	FBgn0034886	37741	PDE8B	8622	13
#N/A	#N/A	d03020	#N/A	S1	GMR-hTDP-43-specific	CG4302	FBgn0027073	37420	UGT2B10	7365	8
#N/A	#N/A	d03164	#N/A	S1	GMR-hTDP-43-specific	Ddr	FBgn0053531	3346209	DDR2	4921	14
#N/A	#N/A	d03347	#N/A	S2	GMR-hTDP-43-specific	CG32473	FBgn0052473	41636	ENPEP	2028	11
#N/A	#N/A	d03350	#N/A	S2	GMR-hTDP-43-specific	0	FBgn0029775	0	#N/A	#N/A	#N/A
#N/A	#N/A	d03423	#N/A	S1	GMR-hTDP-43-specific	CG34417	FBgn0085446	31591	SMTNL1	219537	6
#N/A	#N/A	d03689	#N/A	S1	GMR-hTDP-43-specific	0	0	0	#N/A	#N/A	#N/A
#N/A	#N/A	d03812	#N/A	S1	GMR-hTDP-43-specific	Cyt-c-p	FBgn0000409	34996	CYCS	54205	14
#N/A	#N/A	d03852	#N/A	S1	GMR-hTDP-43-specific	PGRP-SD	FBgn0035806	38858	PGLYRP1	8993	5
#N/A	#N/A	d04311	#N/A	S1	GMR-hTDP-43-specific	tio	FBgn0028979	44272	TSHZ1	10194	6
#N/A	#N/A	d04596	#N/A	S1	GMR-hTDP-43-specific	fz3	FBgn0027343	31023	FZD4	8322	2
#N/A	#N/A	d04715	#N/A	S1	GMR-hTDP-43-specific	CAHbeta	FBgn0037646	41070	0	0	0
#N/A	#N/A	d04821	#N/A	S2	GMR-hTDP-43-specific	CG12708	FBgn0030666	32502	0	0	0
#N/A	#N/A	d04899	#N/A	S1	GMR-hTDP-43-specific	bnl	FBgn0014135	42356	FGF20	26281	4
#N/A	#N/A	d05137	#N/A	S1	GMR-hTDP-43-specific	Mob2	FBgn0259481	39293	MOB2	81532	8
#N/A	#N/A	d05176	#N/A	S2	GMR-hTDP-43-specific	CG3655	FBgn0040397	31056	0	0	0
#N/A	#N/A	d05436	#N/A	S2	GMR-hTDP-43-specific	CG10092	FBgn0037526	40929	RARS2	57038	15
#N/A	#N/A	d05680	#N/A	S2	GMR-hTDP-43-specific	daw	FBgn0031461	33474	TGFB1	7040	5
#N/A	#N/A	d05698	#N/A	S1	GMR-hTDP-43-specific	Rtnl1	FBgn0053113	33721	RTN4	57142	9
#N/A	#N/A	d05823	#N/A	S2	GMR-hTDP-43-specific	0	0	0	#N/A	#N/A	#N/A
#N/A	#N/A	d06195	#N/A	S1	GMR-hTDP-43-specific	pxb	FBgn0053207	41899	0	0	0
#N/A	#N/A	d06490	#N/A	S1	GMR-hTDP-43-specific	Flo-2	FBgn0024753	32425	FLOT2	2319	12
#N/A	#N/A	d06732	#N/A	S2	GMR-hTDP-43-specific	E(spl)mbeta-HLH	FBgn0002733	43152	HES2	54626	6
#N/A	#N/A	d06808	#N/A	S1	GMR-hTDP-43-specific	sbb	FBgn0010575	44027	ZNF609	23060	7
#N/A	#N/A	d06862	#N/A	S1	GMR-hTDP-43-specific	CG7458	FBgn0037144	40441	SLC22A14	9389	3
#N/A	#N/A	d07239	#N/A	S1	GMR-hTDP-43-specific	sas	FBgn0002306	40861	WISP1	8840	1
#N/A	#N/A	d07490	#N/A	S1	GMR-hTDP-43-specific	spi	FBgn0005672	35253	BTC	685	1
#N/A	#N/A	d07542	#N/A	S1	GMR-hTDP-43-specific	0	0	0	#N/A	#N/A	#N/A
#N/A	#N/A	d07618	#N/A	S2	GMR-hTDP-43-specific	Hsp22	FBgn0001223	3772576	HSPB6	126393	4
#N/A	#N/A	d07698	#N/A	S1	GMR-hTDP-43-specific	NetA	FBgn0015773	32398	NTN1	9423	11
#N/A	#N/A	d07975	#N/A	S1	GMR-hTDP-43-specific	Dak1	FBgn0028833	43165	CMPK1	51727	12
#N/A	#N/A	d08263	#N/A	S2	GMR-hTDP-43-specific	Tsp	FBgn0031850	33941	COMP	1311	14
#N/A	#N/A	d08630	#N/A	S2	GMR-hTDP-43-specific	0	0	0	#N/A	#N/A	#N/A
#N/A	#N/A	d08744	#N/A	S1	GMR-hTDP-43-specific	CG5431	FBgn0034888	37743	SULT1B1	27284	7
#N/A	#N/A	d08770	#N/A	S1	GMR-hTDP-43-specific	msi	FBgn0011666	43087	MSI2	124540	4
#N/A	#N/A	d08923	#N/A	S1	GMR-hTDP-43-specific	0	FBgn0262729	0	#N/A	#N/A	#N/A
#N/A	#N/A	d08982	#N/A	S1	GMR-hTDP-43-specific	CG12484	FBgn0086604	37310	PSG1	5669	1
#N/A	#N/A	d09625	#N/A	S1	GMR-hTDP-43-specific	dsx	FBgn0000504	40940	DMRTB1	63948	3
#N/A	#N/A	d09785	#N/A	S2	GMR-hTDP-43-specific	Den1	FBgn0033716	36339	SENP8	123228	14
#N/A	#N/A	d10247	#N/A	S3	GMR-hTDP-43-specific	dpn	FBgn0010109	35800	HES1	3280	8
#N/A	#N/A	d10791	#N/A	S1	GMR-hTDP-43-specific	Fili	FBgn0085397	5740472	LRRN1	57633	2
#N/A	#N/A	d11193	#N/A	S2	GMR-hTDP-43-specific	Plc21C	FBgn0004611	33204	PLCB1	23236	14
#N/A	#N/A	d11280	#N/A	S1	GMR-hTDP-43-specific	tlk	FBgn0086899	318206	TLK2	11011	11
#N/A	#N/A	d11400	#N/A	S2	GMR-hTDP-43-specific	0	0	0	#N/A	#N/A	#N/A
#N/A	#N/A	d11447	#N/A	S1	GMR-hTDP-43-specific	jing	FBgn0086655	35555	AEBP2	121536	6
#N/A	#N/A	d11720	#N/A	S2	GMR-hTDP-43-specific	CASK	FBgn0013759	42567	CASK	8573	13
#N/A	#N/A	d11752	#N/A	S2	GMR-hTDP-43-specific	bip1	FBgn0026263	38891	0	0	0
#N/A	#N/A	e01992	#N/A	S3	GMR-hTDP-43-specific	0	0	0	#N/A	#N/A	#N/A
#N/A	#N/A	e03041	#N/A	S1	GMR-hTDP-43-specific	Rab5	FBgn0014010	33418	RAB5B	5869	14
#N/A	#N/A	f00987	#N/A	S1	GMR-hTDP-43-specific	0	0	0	#N/A	#N/A	#N/A
#N/A	#N/A	f01592	#N/A	S3	GMR-hTDP-43-specific	CG4362	FBgn0038784	42410	0	0	0
#N/A	#N/A	f02194	#N/A	S2	GMR-hTDP-43-specific	CG13689	FBgn0031270	33241	0	0	0
#N/A	#N/A	f02607	#N/A	S1	GMR-hTDP-43-specific	CAHbeta	FBgn0037646	41070	0	0	0
#N/A	#N/A	f03114	#N/A	S1	GMR-hTDP-43-specific	Spn	FBgn0010905	46194	PPP1R9A	55607	9
#N/A	#N/A	f03418	#N/A	S3	GMR-hTDP-43-specific	CG34288	FBgn0085317	5740644	0	0	0
#N/A	#N/A	f05265	#N/A	S1	GMR-hTDP-43-specific	nmo	FBgn0011817	38890	NLK	51701	12
#N/A	#N/A	f06985	#N/A	S2	GMR-hTDP-43-specific	larp	FBgn0261618	53567	LARP1B	55132	10
#N/A	#N/A	f07723	#N/A	S1	GMR-hTDP-43-specific	spir	FBgn0003475	45931	SPIRE1	56907	11

## Sheet: Kankel et al Table S1 Legend
Table S1. List of Exelixis insertions and associated disrupted genes that modify GMR-hFUSR521C and/or GMR-hTDP-43 degenerative eye phenotypes. Columns A, B and C list the Exelixis strains that modify both screening strains (Column A), GMR-hFUSR521C (Column B) or GMR-hTDP-43 (Column C). Columns D and E provide the type of modification, where an “E” represents enhancement, an “S” represents suppres…
